# Supplementary material for: Mapping architectural and transcriptional alterations in non-lesional and lesional epidermis in vitiligo
Source: PubMed Central journal article supplement (PMC5575244; doi:10.1038/s41598-017-10253-w), 2017-08-29
Supplement: 41598_2017_10253_MOESM1_ESM.pdf [file 41598_2017_10253_MOESM1_ESM.pdf]

# Mapping architectural and transcriptional alterations in non-lesional and lesional epidermis in Vitiligo

Archana Singh<sup>1</sup>, Vishvabandhu Goherwal<sup>1,3</sup>, Päivi Junni<sup>4</sup>, Vinaya Vijayan<sup>5</sup>, Manisha Tiwari<sup>1</sup>, Parul Ganju<sup>2</sup>, Avinash Kumar<sup>2</sup>, Pankaj Sharma<sup>6</sup>, Tanveer Fatima<sup>6</sup>, Aayush Gupta<sup>7</sup>, Ananthaprasad Holla<sup>8</sup>, Hemanta K. Kar<sup>6</sup>, Sangeeta Khanna<sup>1</sup>, Lipi Thukral<sup>1</sup>, Garima Malik<sup>1</sup>, Krishnamurthy Natarajan<sup>9</sup>, Chetan J. Gadgil<sup>5</sup>, Riitta Lahesmaa<sup>4</sup>, Vivek T. Natarajan<sup>1,3\*</sup>, Rajni Rani<sup>2\*</sup> and Rajesh S. Gokhale<sup>1,2,5,10\*</sup>

## Affiliations:

<sup>1</sup>CSIR-Institute of Genomics and Integrative Biology, Mathura Road, Delhi, India.

<sup>2</sup>National Institute of Immunology, ArunaAsaf Ali Marg, New Delhi, India.

<sup>3</sup>Academy of Scientific and Innovative Research, Delhi, India

<sup>4</sup>Turku Centre for Biotechnology, University of Turku and ÅboAkademi University, Finland.

<sup>5</sup>CSIR-National Chemical Laboratory, Chemical Engineering Division, Pune, India.

<sup>6</sup>Department of Dermatology, Post Graduate Institute for Medical Education and Research (PGIMER), Dr. Ram Manohar Lohia Hospital, New Delhi, India.

<sup>7</sup>DY Patil Medical College, Pimpri, Pune, India.

<sup>8</sup>MelanoSite, Center for Advanced Vitiligo Treatment and Collaborative Pigment Cell Research Delhi, India.

<sup>9</sup>School of Life Sciences, Jawaharlal Nehru University, New Delhi, India.

<sup>10</sup>Jawaharlal Nehru Centre for Advanced Scientific Research, Bangalore, India.

\* Corresponding Author

**Keywords:** Vitiligo, transcriptome, putrescine, tissue remodeling, epidermis, cornification.

**Running Title:** Architectural and transcriptional alterations in vitiligo

### **Supplementary Figures and tables:**

**Figure S1: Unsupervised clustering of genes involved in maintaining epidermal architecture and cell-cell adhesion of keratinocytes.** Blue is downregulated, and red is upregulated.

**Figure S2: Transcriptional regulation of genes involved in keratinization and cornification process.** Fold change values plotted for 6 lesional epidermis samples compared to their corresponding non-lesional tissue. Significance is calculated using paired t test (n=6). \* indicates significant change in lesional skin. 18s rRNA was used as normalization control. SYBR green chemistry was used for Real time PCR.

**Figure S3: Hematoxylin and Eosin (H&E) stained sections of Non-lesional (NL) and Lesional (L) skin of vitiligo subjects (N=15).**

**Figure S4: Hematoxylin and Eosin (H&E) stained sections of non-lesional (NL), lesional (L) and non-lesional skin proximal to the lesion (P) in vitiligo subjects (N=7).**

### **Figure S5: Architectural alterations in lesional vs proximal non-lesional skin**

Bar plots depicting architectural features quantitated in skin sections: thickness of stratified epithelia (from stratum basale to stratum corneum), cellular epidermis (from stratum basale to stratum granulosum) and thickness of stratum corneum in  $\mu\text{m}$ , ratio of length of secondary ( $\mu\text{m}$ ) to primary ridge ( $\mu\text{m}$ ) and the total number of cells per square mm (n=7 pairs) in lesional (L) and proximal (P) samples. 'P' refers to non-lesional skin biopsy taken from anatomical site proximal to the vitiligo lesion. The box plot represents the mean  $\pm$  range of the data. Indicated p-values computed using a paired t-test involving n=7 pairs (L vs P).

**Figure S6: Polyamine metabolism pathway:** The three polyamines, putrescine, spermidine and spermine are derived from ornithine. SMS converts putrescine to spermidine and spermine, which are further converted by SSAT-1 enzyme to N1-acetyly spermidine and N1-acetylspermine respectively. Breakdown of the N-acetylated polyamines by PAOX results in putrescine. SSAT-1 expression is upregulated at transcriptional level in lesional skin (indicated in red color). ODC- ornithine decarboxylase, SRM-spermidine synthase, SMS- spermine synthase, SMO-spermine oxidase, SAT-1- PAO- peroxisomal N(1)-acetyl-spermine/spermidine oxidase, MAOB- monoamine oxidase B, SSAT1- spermidine/spermine N1-acetyltransferase 1, TGM1- transglutaminase 1.

**Figure S7: Thin layer chromatographic analysis of polyamines in normal healthy skin** (a) Thin layer chromatographic analysis of polyamines extracted using perchloric acid (non-covalently bound) or hydrolyzed using hydrochloric acid (covalently conjugated) from isolated stratum corneum from normal healthy skin. PUT, SPD, SPN in first 3 lanes were used as standards. DAH was used as internal standard to calculate the relative amount of specific polyamines present in the epidermis. PUT- Putrescine, SPD- spermidine, SPN- spermine, DAH- 1,7-diaminoheptane.

**Figure S8: Global network of genes and its corresponding functional linkages i.e., interacting genes.** Each protein is colored according to upregulation (red), downregulation (green), or no regulation (grey). White denotes proteins for which corresponding probes were not found in the microarray. The regulation score was calculated from microarray experiments performed on 15 vitiligo samples, where only agreement between  $\geq 11$  samples was included as a significant regulation.

**Figure S9: Altered functional networks in vitiligo**

Network map of clusters of genes associated with vitiligo predisposition along with their interacting partners were mapped to the differential expression of genes observed in vitiligo. Three networks are shown- vitamin D receptor, apoptosis and stress response. Each node (gene) is colored according to upregulation (red), downregulation (green), or no regulation (grey). White denotes proteins for which

corresponding probes were not found in the microarray. The regulation score was calculated from microarray experiments performed on 15 vitiligo samples, where only agreement between  $\geq 11$  samples was included as a significant regulation.

**Supplementary Table 1: Top 10 differentially regulated pathways in genome-wide transcriptome analysis of non-lesional and lesional skin.**

**Supplementary Table 2: List of 45 genes used as input for constructing functional interactome.**

**Supplementary Table 3: List of protein-protein interactions for the six subnetworks** depicted in Figure 4. These genes directly interact physically/functionally with the genes that harbor predisposition to vitiligo (as listed in supplementary table 2). pi denotes physical interaction.

Fig S1

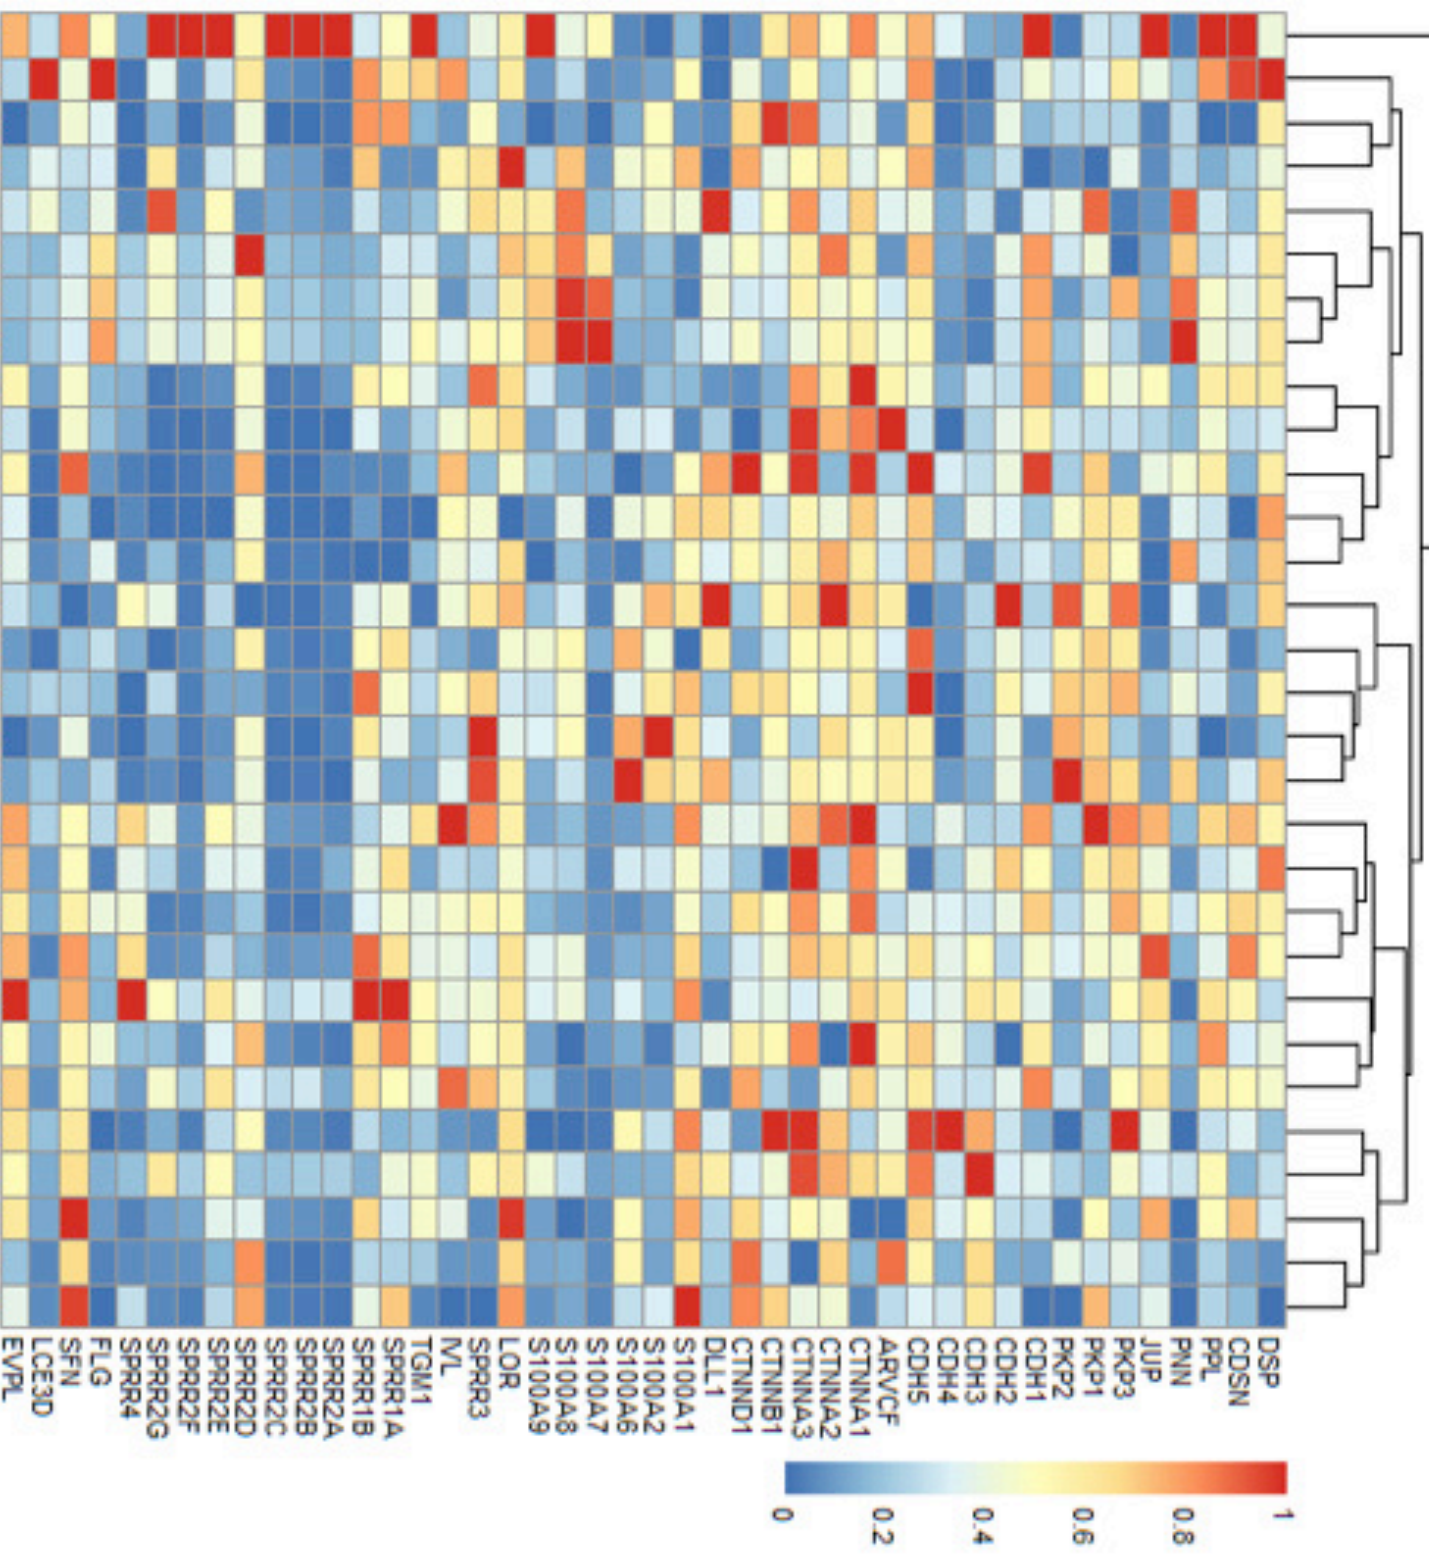

Fig S2

**Regulation of genes involved in keratinization and cornification process**

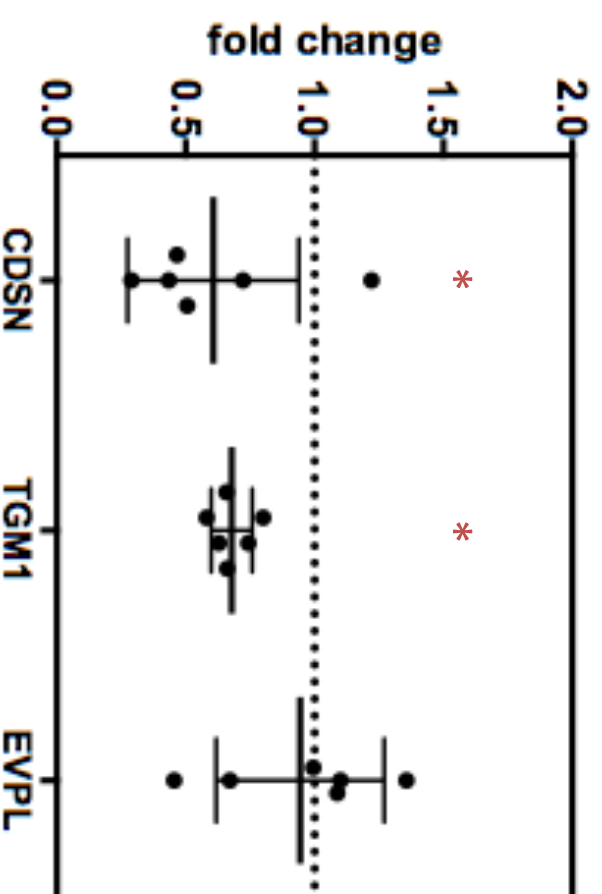

Fig S3

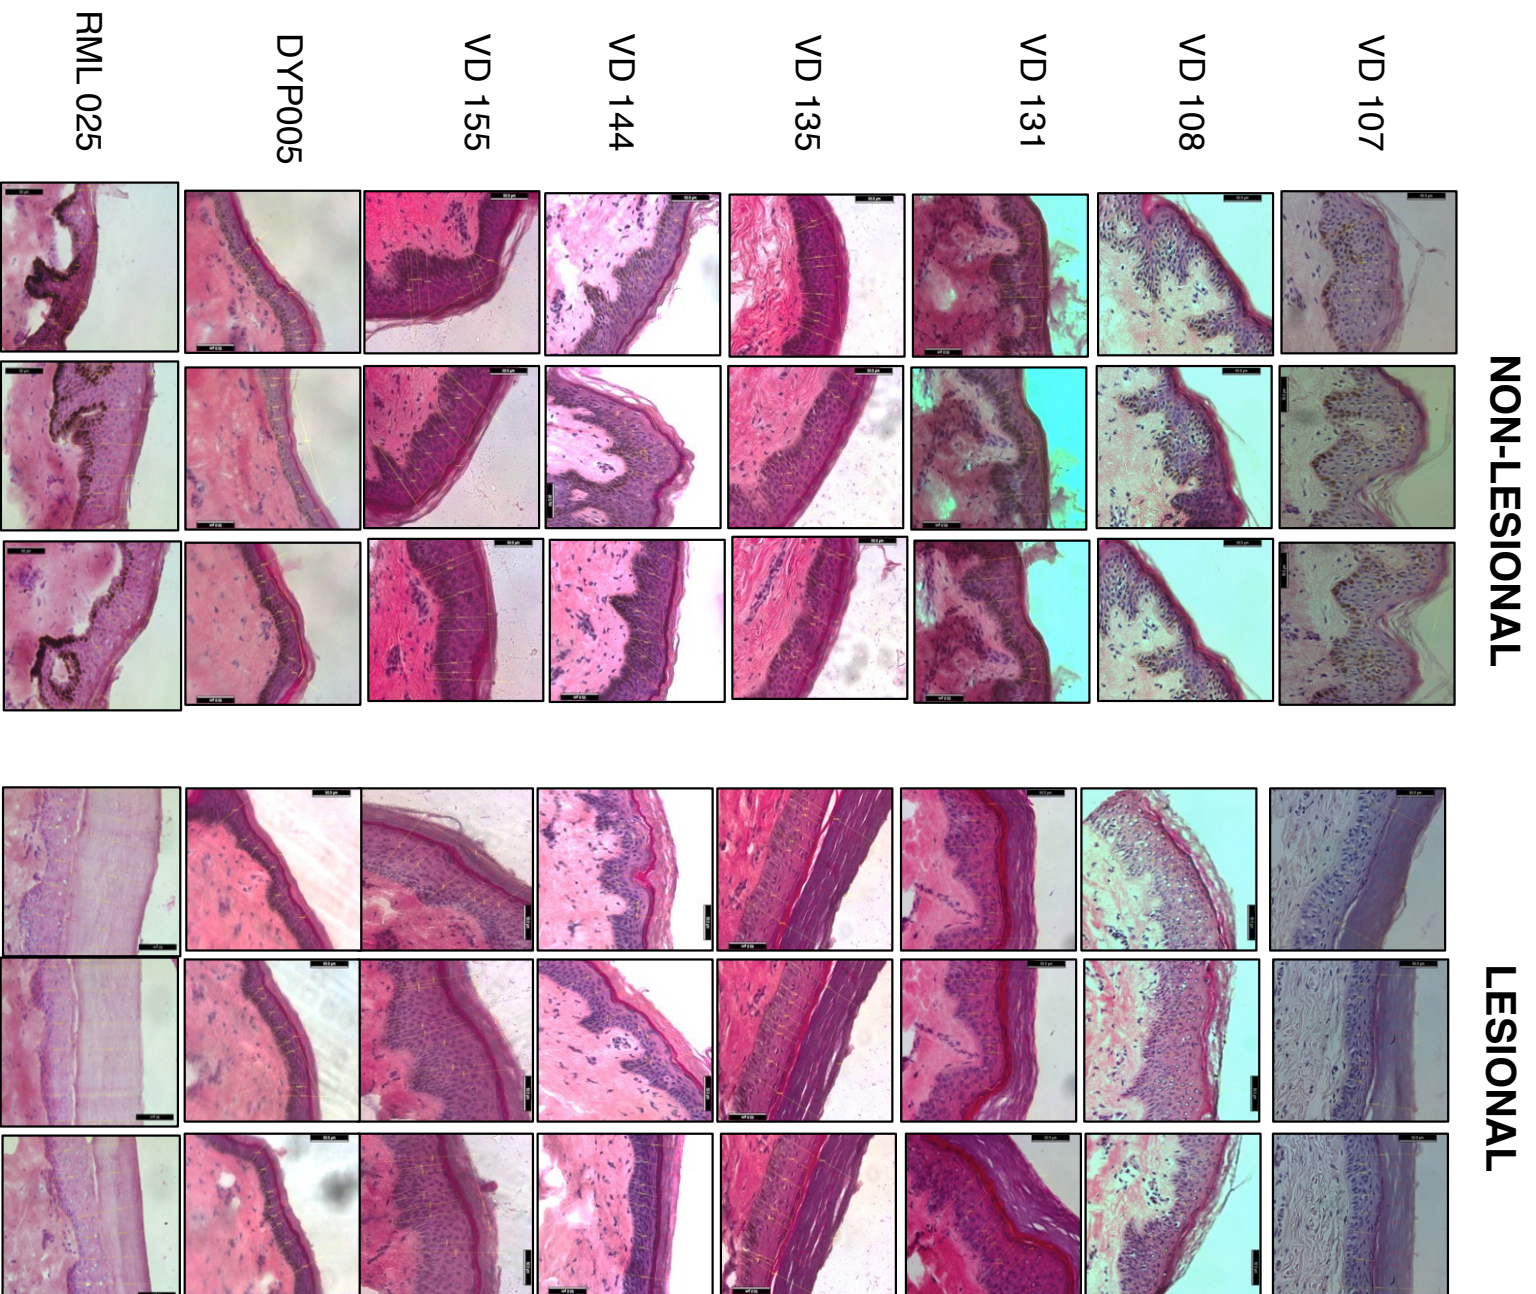

Fig S4

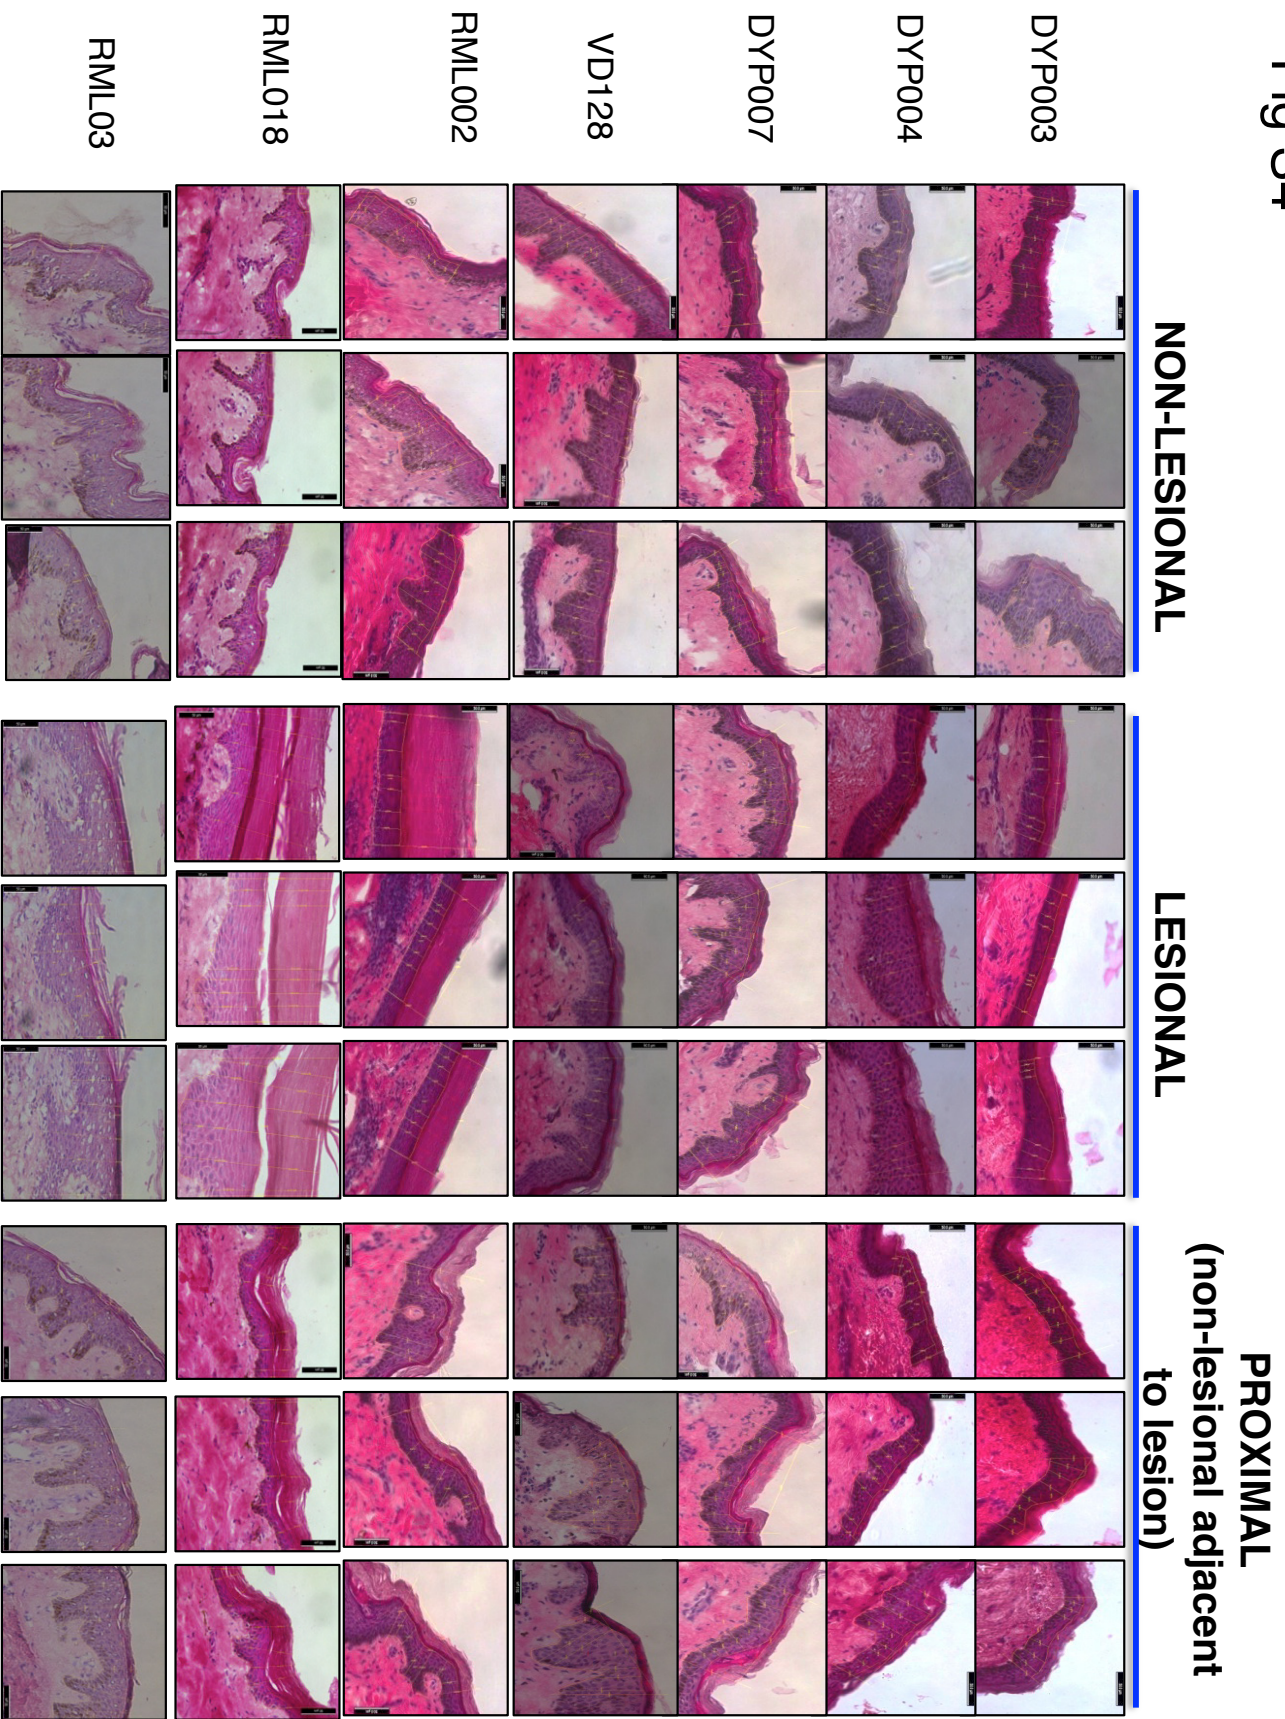



**Fig S5**

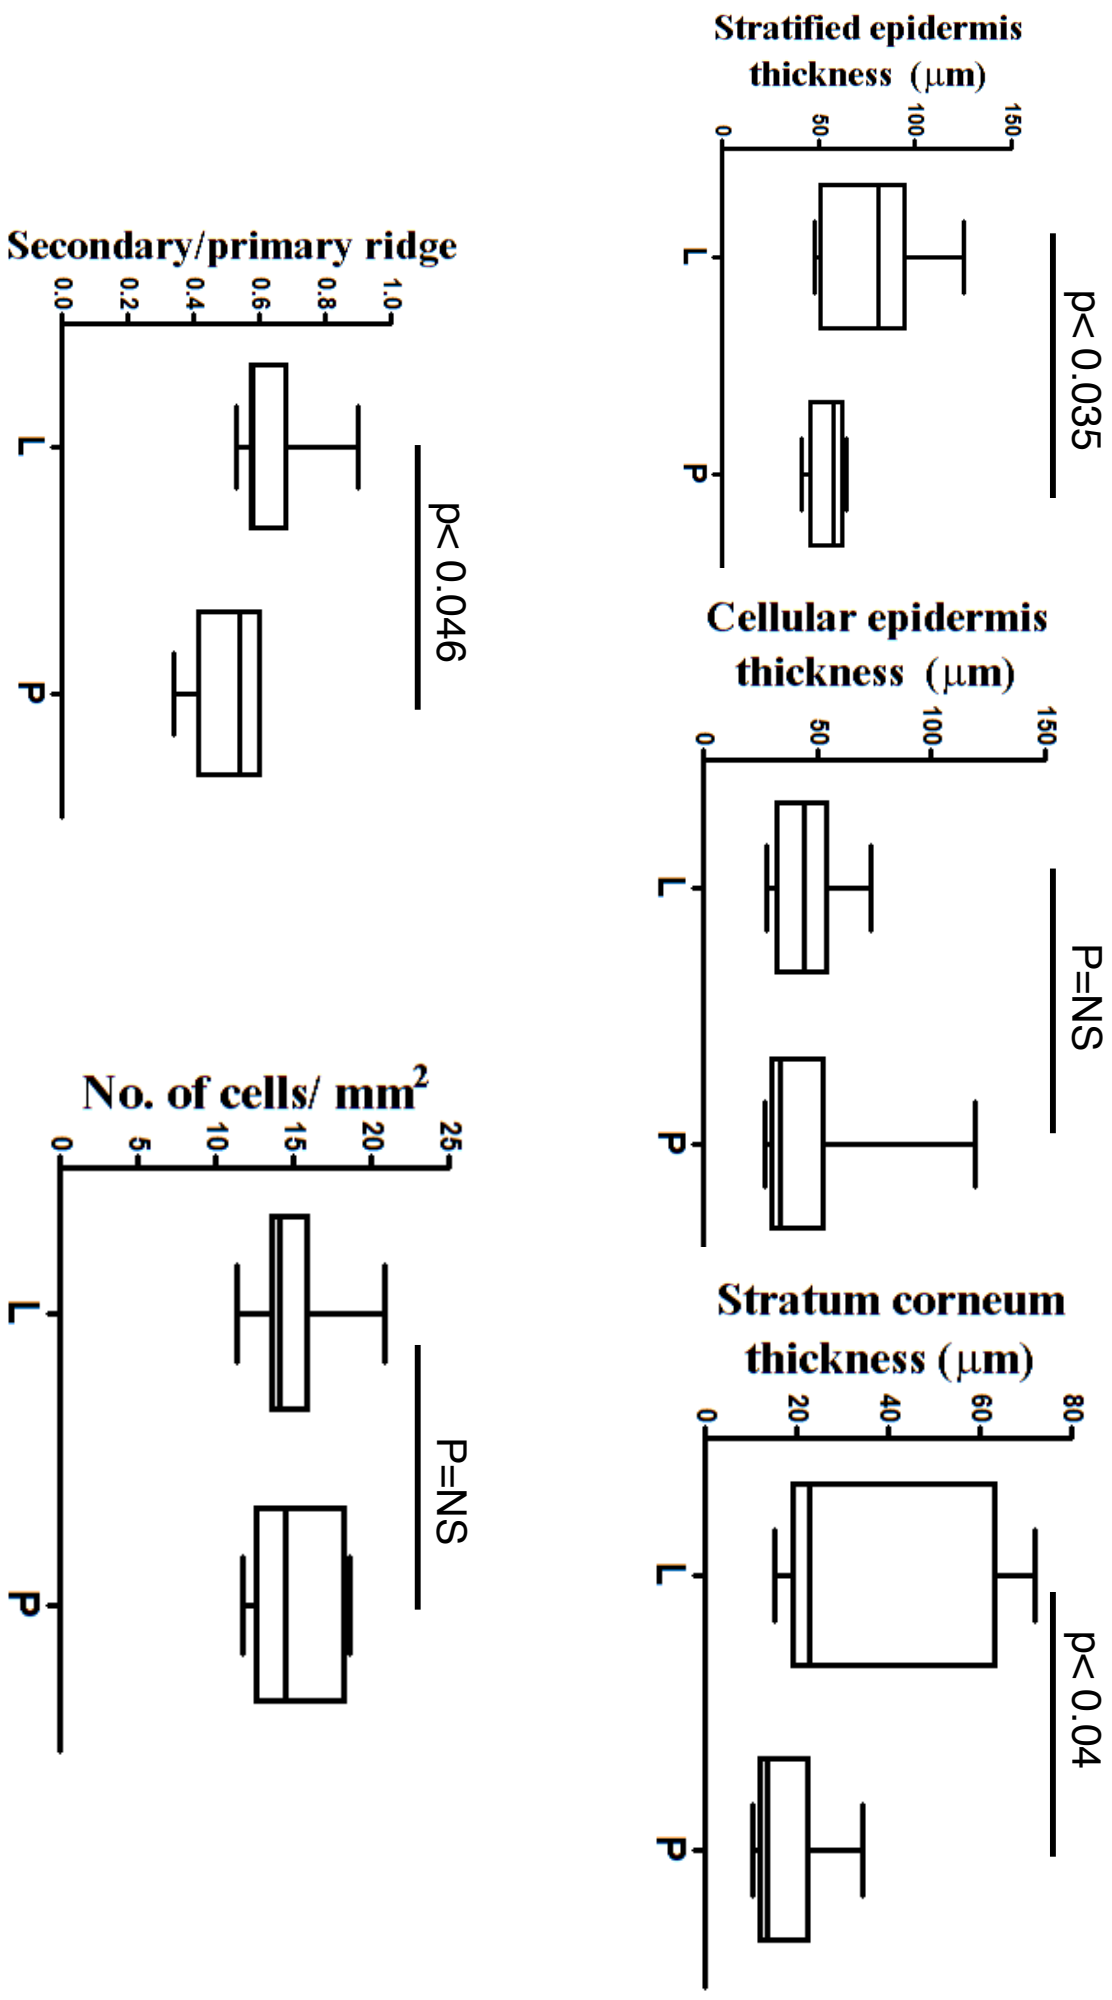

Fig S6

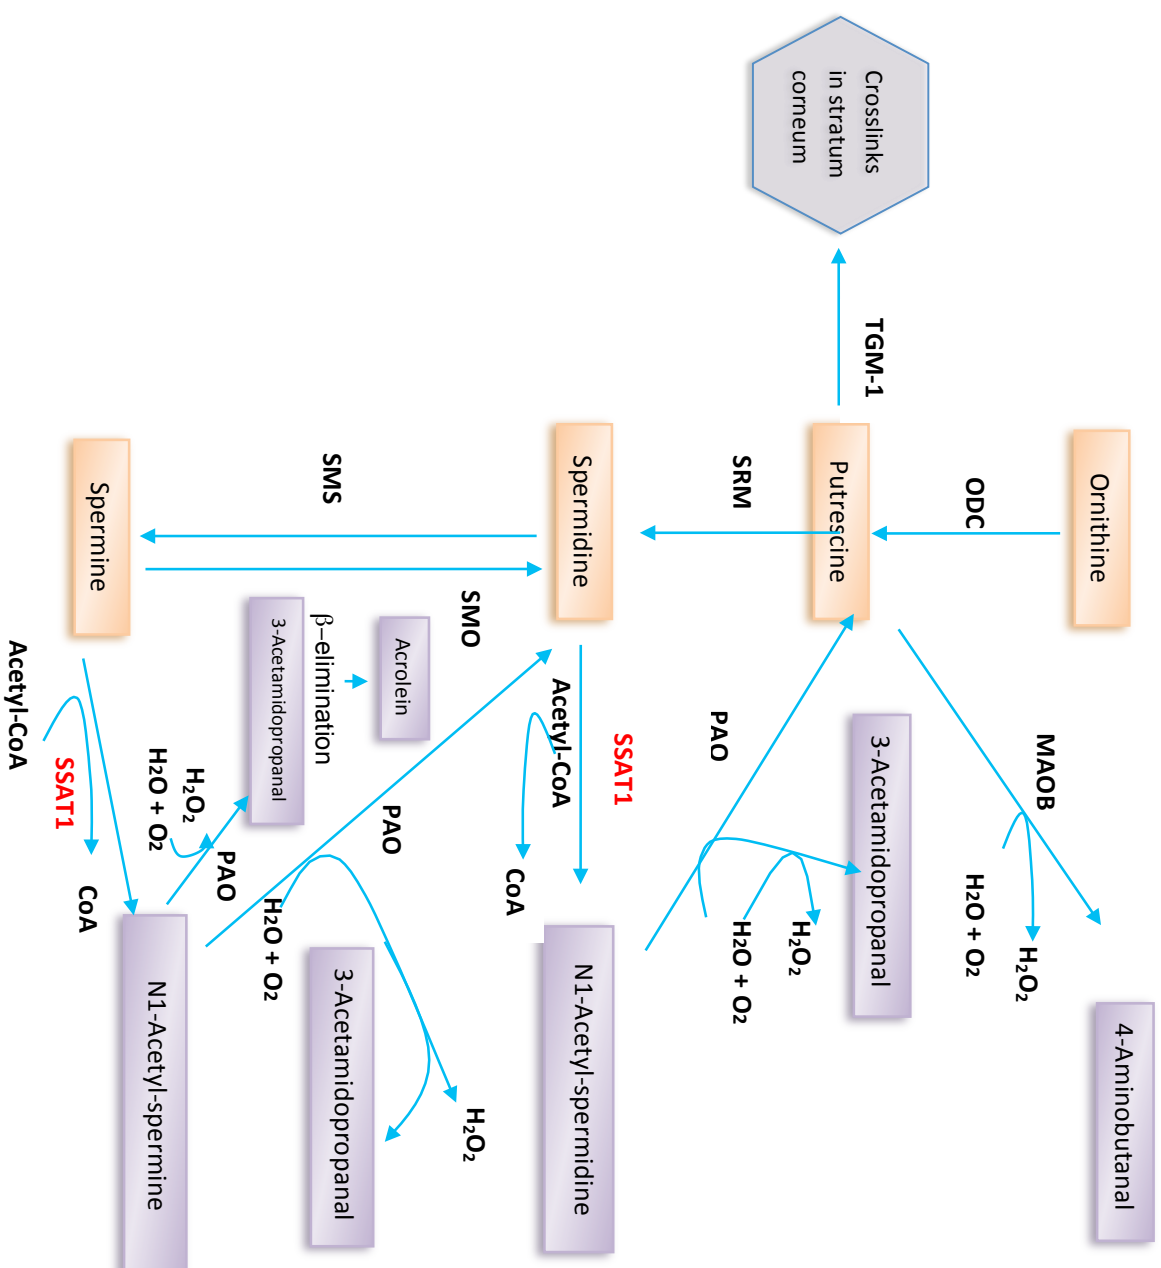

Fig S7

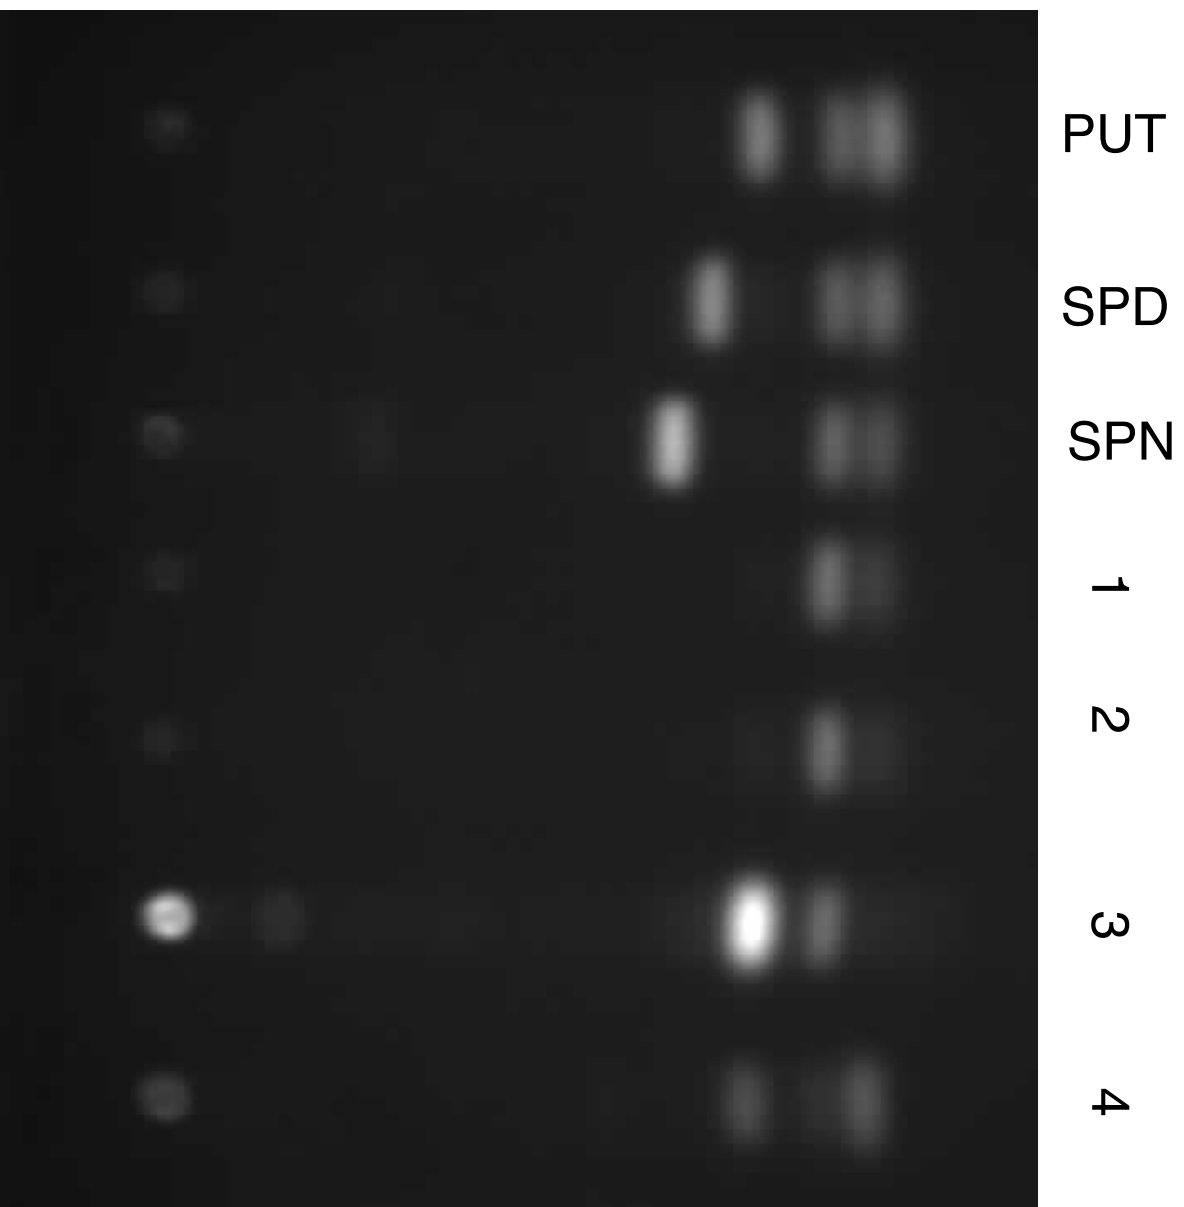

1. Mock acid (HCl) hydrolysis
2. Mock perchloric acid extraction
3. Acid (HCl) hydrolysis (stratum corneum of normal skin)
4. Perchloric acid extraction (stratum corneum of normal skin)

Fig S8

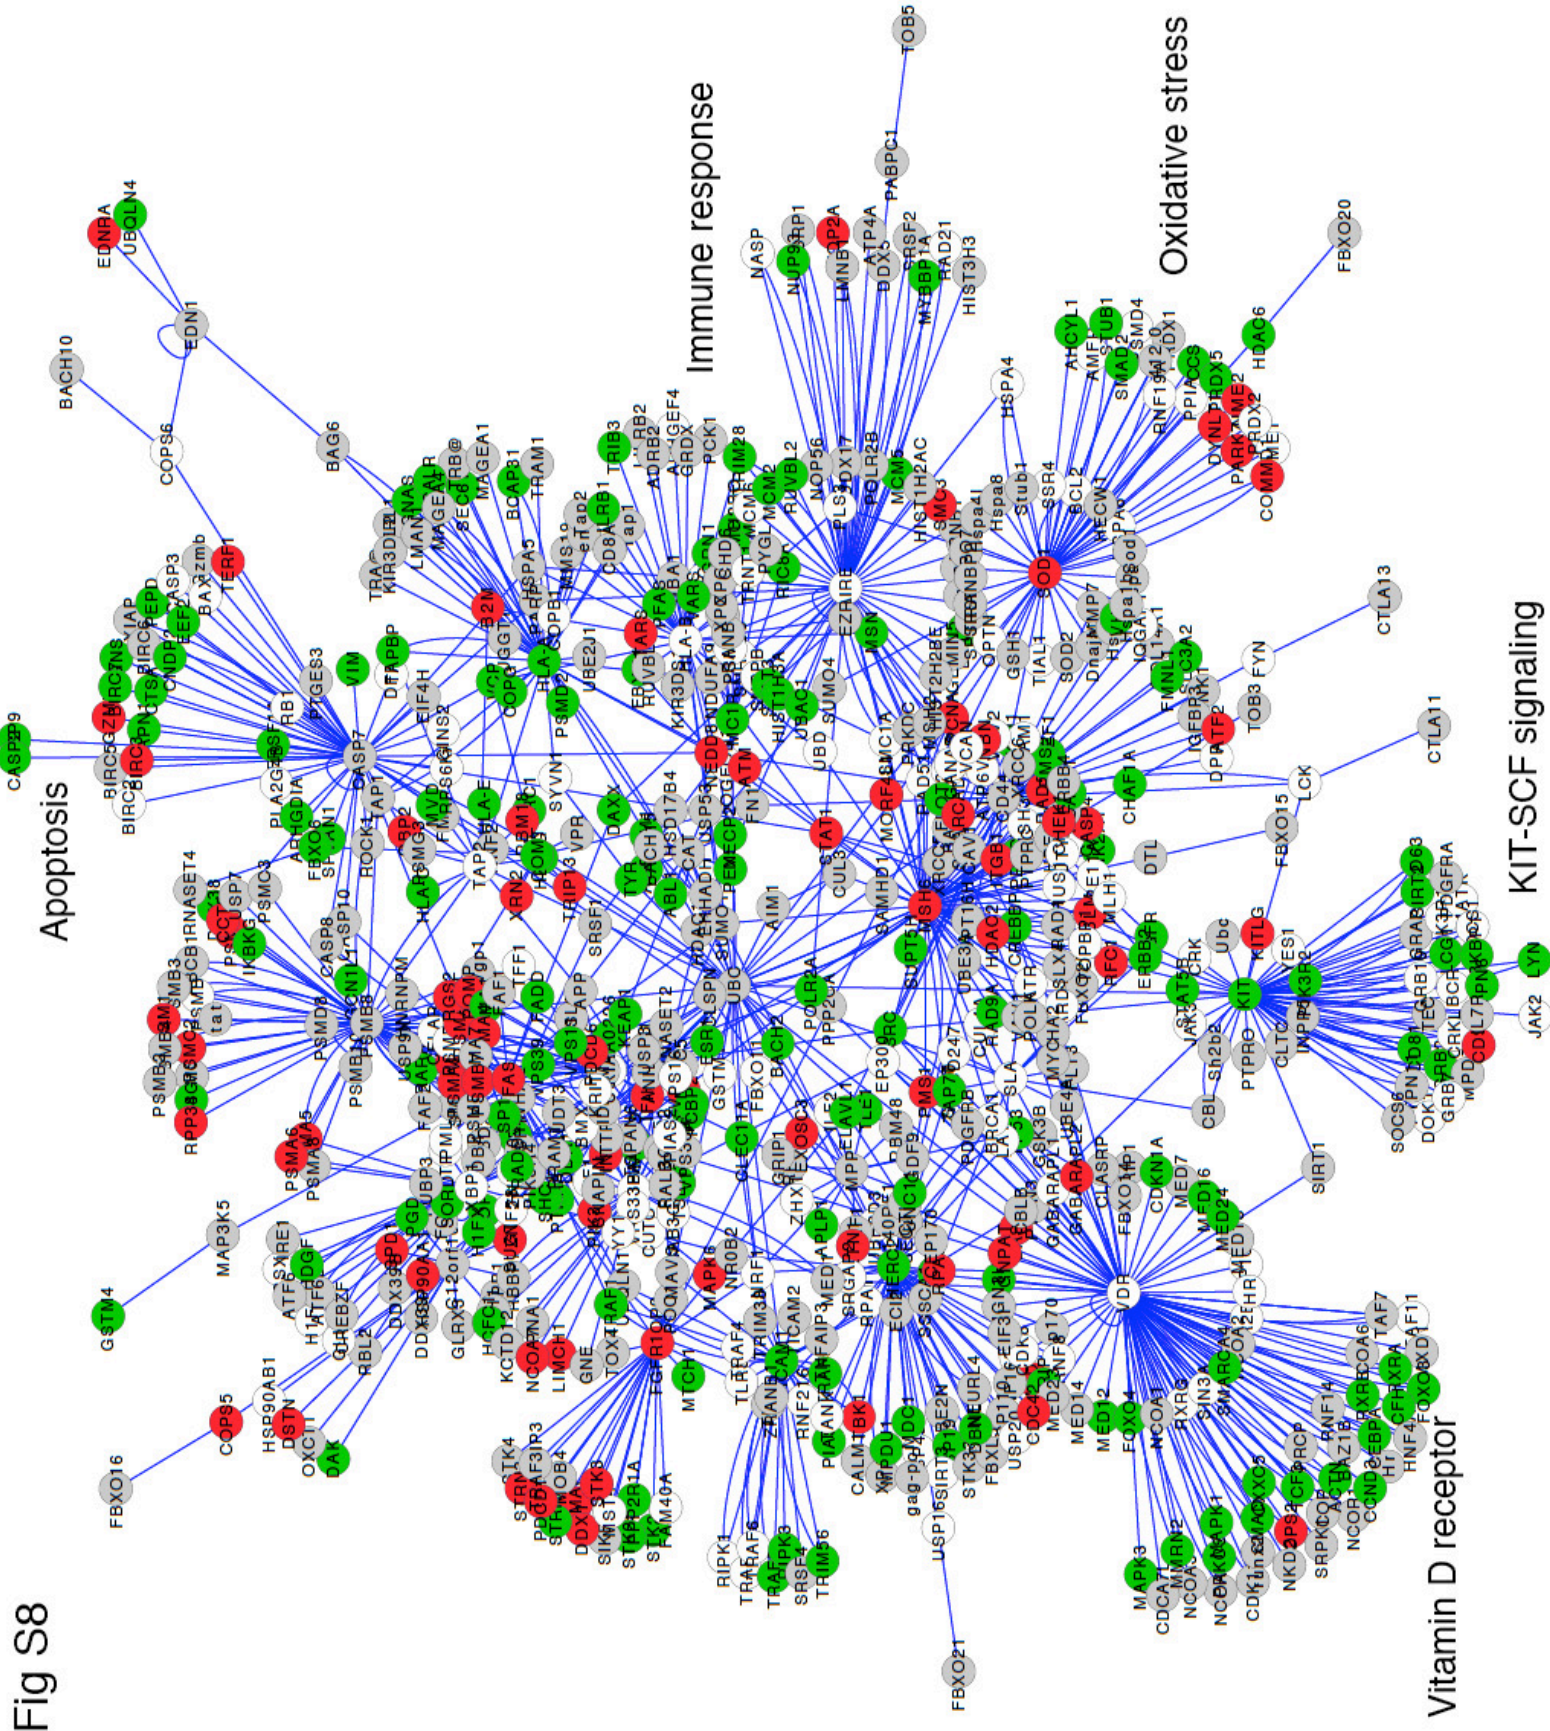

Fig S9

### Vitamin D receptor

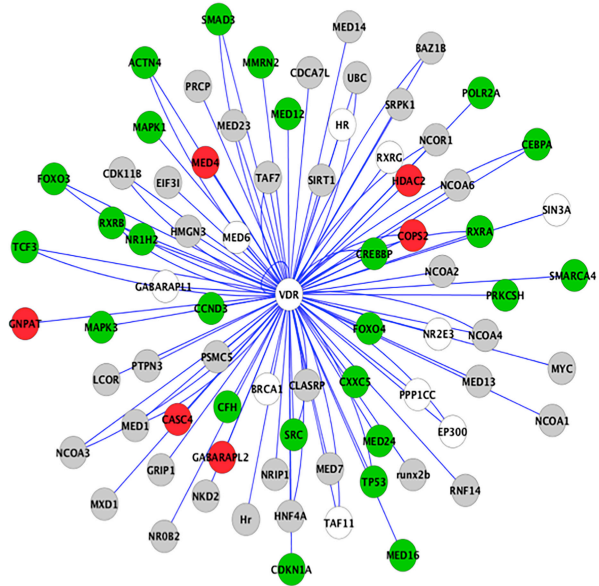

### Apoptosis

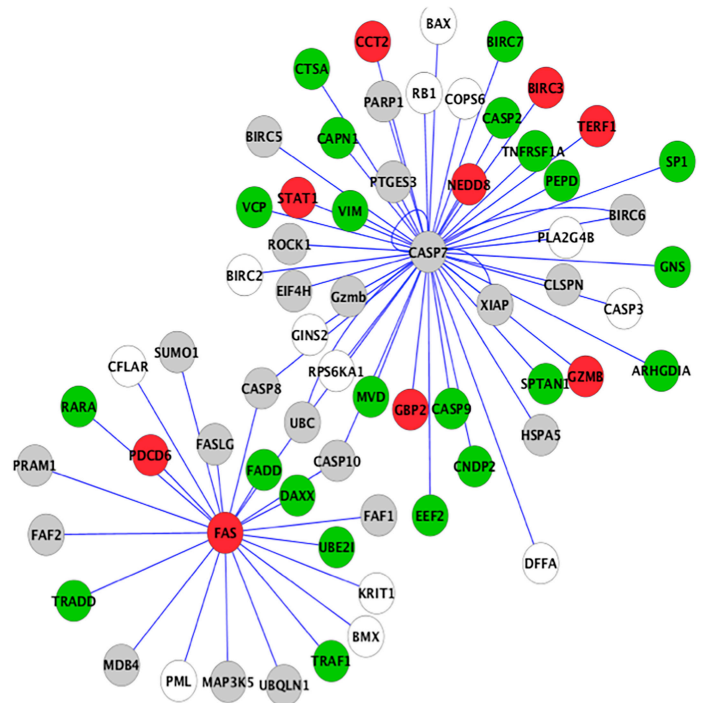

### Stress response

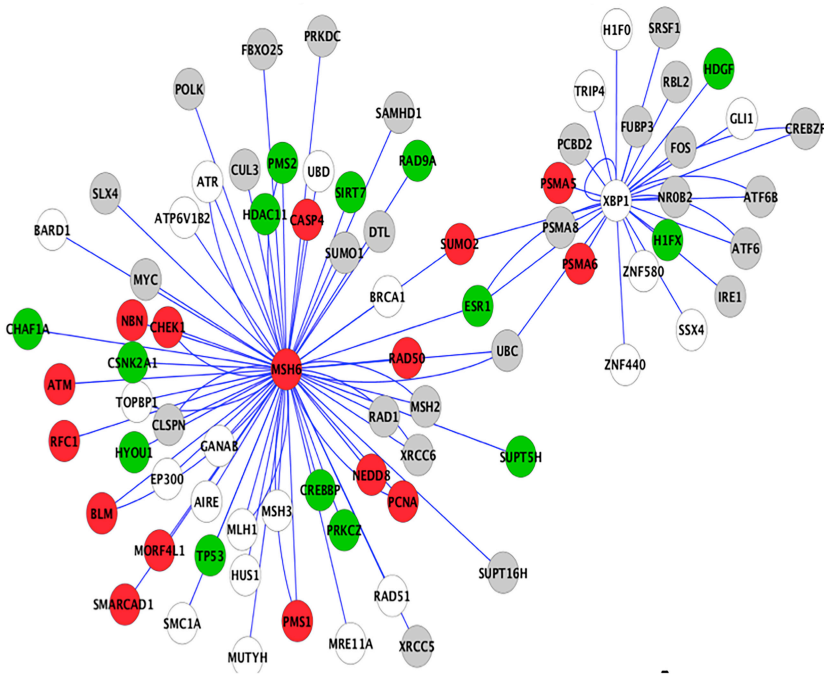

**Supplementary Table 1: Vitiligo: Top 10 regulated pathways in vitiligo genome-wide transcriptional analysis**

| <b>UP pathways</b>                            | <b>Genes</b>                                                                                                                                                                                                                                                                                                                                                                                                                                                                              | <b>pVal</b> |
|-----------------------------------------------|-------------------------------------------------------------------------------------------------------------------------------------------------------------------------------------------------------------------------------------------------------------------------------------------------------------------------------------------------------------------------------------------------------------------------------------------------------------------------------------------|-------------|
| <b>RNA processing</b>                         | SR140, CWC15, WBP4, PNN, DDX46, SFRS5, RPL7, FRG1, DNAJC8, LSM3, ZCCHC6, PPWD1, RBM25, RPS24, SFRS12, SNRPA1, MRPL1, EXOSC8, EXOSC9, SF3B14, MPHOSPH10, RPL26, SSB, INTS12, CDC5L, PRPF18, CCDC76, PCF11, PPIG, UPF3B, LARP7, GTF2F2, ZRANB2, SYF2, SLU7, SNRPG, THOC1                                                                                                                                                                                                                    | 7.47E-12    |
| <b>Membrane-enclosed lumen</b>                | ENY2, ITGB3BP, PTGS2, LYAR, MKI67IP, MBIP, SRP19, WBP4, PNN, WDR75, ATP5EP2, DDX21, TPR, TOP2B, GNL2, TOP2A, COX17, GNL3, OXR1, MRPL1, EXOSC8, EXOSC9, SSBP1, NOL8, ANAPC4, CCNL1, IFI16, CDC5L, CDK7, ZFR, GTF2B, PCF11, COQ3, MRPS18C, RPAIN, CCDC55, LARP7, ATP5C1, SLU7, SNRPG, THOC1, MRPS17, RBM34, HMGB2, SHFM1, ANAPC10, KIAA0020, ERCC5, DDX46, FRG1, GPSM2, LEO1, THBS2, RBM25, SRGN, MRPS22, MPHOSPH10, SSB, INTS12, WRN, PRPF18, SMC3, HSP90B1, PPIG, CDKN2AIP, PSMC1, GTF2F2 | 1.10E-10    |
| <b>RNA splicing</b>                           | CWC15, WBP4, PNN, SFRS5, DDX46, FRG1, DNAJC8, LSM3, RBM25, PPWD1, SFRS12, SNRPA1, SF3B14, MPHOSPH10, CDC5L, PRPF18, PCF11, UPF3B, PPIG, GTF2F2, SYF2, ZRANB2, SLU7, THOC1, SNRPG                                                                                                                                                                                                                                                                                                          | 2.12E-10    |
| <b>Ribosomal subunit</b>                      | RPL17, MRPL1, MRPS17, MRPS22, RPL26, RPL24, MRPL22, MRPS18C, RPL7, RPL6, RPL21, RPL34, RPL26L1, RPS24                                                                                                                                                                                                                                                                                                                                                                                     | 1.41E-07    |
| <b>Nuclear mRNA splicing, via spliceosome</b> | SNRPA1, PCF11, UPF3B, SFRS5, SF3B14, DNAJC8, GTF2F2, CWC15, SLU7, RBM25, SNRPG                                                                                                                                                                                                                                                                                                                                                                                                            | 3.88E-04    |

| <b>DOWN pathway</b>       | <b>Genes</b>                                             | <b>pVal</b> |
|---------------------------|----------------------------------------------------------|-------------|
| <b>Cornified envelope</b> | EVPL, SPRR2C, SPRR2A, TGM1, SPRR2B, SPRR2F, SPRR2E, CDSN | 2.37E-07    |

|                                       |                                                                                                 |          |
|---------------------------------------|-------------------------------------------------------------------------------------------------|----------|
| <b>Lysosome</b>                       | PNPLA7, SGSH, C1ORF85, CLN3, GM2A, CTSD, CYBASC3, DPP7, CLCN7, CTSF, GBA                        | 5.20E-04 |
| <b>Melanin biosynthesis</b>           | DCT, TYRP1, SILV                                                                                | 0.005012 |
| <b>Endoplasmic reticulum membrane</b> | CLN3, WFS1, SILV, GPAA1, STIM1, PIGT, UBQLN4, FURIN, PNPLA6, DOLK, DHCR7, CYP26B1, DEGS2, MLANA | 0.005041 |
| <b>LIM domain</b>                     | ABLIM2, CRIP2, FHL3, ZYX, TRIP6, MICALL1                                                        | 0.010729 |
| <b>Stress fiber</b>                   | ACTN4, FHL3, ZYX, MYH14                                                                         | 0.013861 |

**Supplementary table 2- List of 45 input genes for interactome study**

|    |          |
|----|----------|
| 1  | IL1RN    |
| 2  | DDR1     |
| 3  | FAS      |
| 4  | IFIH1    |
| 5  | TAP2     |
| 6  | AIM1     |
| 7  | VDR      |
| 8  | NLRP1    |
| 9  | EDN1     |
| 10 | CLEC11A  |
| 11 | MC1R     |
| 12 | TYR      |
| 13 | OCA2     |
| 14 | HERC2    |
| 15 | KIT      |
| 16 | IL10     |
| 17 | HLA-A    |
| 18 | MYG1     |
| 19 | CCR6     |
| 20 | HLA-C    |
| 21 | TICAM1   |
| 22 | SLA      |
| 23 | MBP      |
| 24 | GSTT1    |
| 25 | GSTM1    |
| 26 | AIRE     |
| 27 | UVRAG    |
| 28 | COMT     |
| 29 | BACH2    |
| 30 | HLA-B    |
| 31 | XBP1     |
| 32 | CTLA4    |
| 33 | SOD1     |
| 34 | FGFR1OP2 |
| 35 | NRF2     |
| 36 | MSH6     |
| 37 | FBXO11   |
| 38 | TOB2     |
| 39 | CAT      |
| 40 | CD44     |
| 41 | PSMB9    |
| 42 | RNASET2  |
| 43 | PSMB8    |
| 44 | CASP7    |
| 45 | SOD2     |



Supplementary Table 3- List of protein-protein interactions for the six sub-networks  
(direct\_pi refers to direct physical interaction between two proteins listed)

| KIT sub-network |           |           |
|-----------------|-----------|-----------|
| Protein 1       |           | Protein 2 |
| BCR             | direct_pi | KIT       |
| BCR             | direct_pi | KIT       |
| KIT             | direct_pi | CD9       |
| KIT             | direct_pi | CD63      |
| KIT             | direct_pi | CD81      |
| CD9             | direct_pi | KIT       |
| CD63            | direct_pi | KIT       |
| CD81            | direct_pi | KIT       |
| KIT             | direct_pi | GRB2      |
| KIT             | direct_pi | PIK3R1    |
| KIT             | direct_pi | PIK3R2    |
| KIT             | direct_pi | SOCS1     |
| SOCS1           | direct_pi | KIT       |
| TEC             | direct_pi | KIT       |
| KIT             | direct_pi | CRKL      |
| KIT             | direct_pi | PIK3R1    |
| KIT             | direct_pi | PLCG1     |
| KIT             | direct_pi | INPP5D    |
| KIT             | direct_pi | YES1      |
| GRB2            | direct_pi | KIT       |
| GRB7            | direct_pi | KIT       |
| STAT1           | direct_pi | KIT       |
| KIT             | direct_pi | STAT1     |
| STAT1           | direct_pi | KIT       |
| KIT             | direct_pi | STAT1     |
| KIT             | direct_pi | CLTC      |
| TEC             | direct_pi | KIT       |
| KIT             | direct_pi | TEC       |
| TEC             | direct_pi | KIT       |
| LCK             | direct_pi | KIT       |
| DOK1            | direct_pi | KIT       |
| LYN             | direct_pi | KIT       |
| DOK1            | direct_pi | KIT       |
| PTPN11          | direct_pi | KIT       |
| KIT             | direct_pi | RFC1      |
| KIT             | direct_pi | JAK2      |
| KIT             | direct_pi | PIK3R1    |
| KIT             | direct_pi | KITLG     |
| KIT             | direct_pi | GRB10     |
| GRB10           | direct_pi | KIT       |

|         |           |        |
|---------|-----------|--------|
| GRB10   | direct_pi | KIT    |
| PLCG1   | direct_pi | KIT    |
| MATK    | direct_pi | KIT    |
| KIT     | direct_pi | PTPN6  |
| PTPN6   | direct_pi | KIT    |
| KIT     | direct_pi | PTPN6  |
| KIT     | direct_pi | PTPN11 |
| KIT     | direct_pi | MPDZ   |
| KIT     | direct_pi | MPDZ   |
| MPDZ    | direct_pi | KIT    |
| KIT     | direct_pi | MATK   |
| LYN     | direct_pi | KIT    |
| KIT     | direct_pi | LYN    |
| CRKL    | direct_pi | KIT    |
| PTPN6   | direct_pi | KIT    |
| PTPN6   | direct_pi | KIT    |
| KIT     | direct_pi | KITLG  |
| KIT     | direct_pi | PTPRO  |
| GRAP    | direct_pi | KIT    |
| GRB2    | direct_pi | KIT    |
| SH3KBP1 | direct_pi | KIT    |
| CBLB    | direct_pi | KIT    |
| KIT     | direct_pi | GRB2   |
| KIT     | direct_pi | Ubc    |
| KIT     | direct_pi | UBC    |
| KIT     | direct_pi | CBL    |
| KIT     | direct_pi | UBC    |
| KIT     | direct_pi | UBC    |
| SOCS6   | direct_pi | KIT    |
| SOCS6   | direct_pi | KIT    |
| KIT     | direct_pi | UBC    |
| SOCS6   | direct_pi | KIT    |
| SIRT1   | direct_pi | KIT    |
| SIRT2   | direct_pi | KIT    |
| KIT     | direct_pi | PIK3R1 |
| PDGFRA  | direct_pi | KIT    |
| PIK3R1  | direct_pi | KIT    |
| KIT     | direct_pi | GRB2   |
| KIT     | direct_pi | Sh2b2  |
| KIT     | direct_pi | Sh2b2  |
| SRC     | direct_pi | KIT    |
| PTPN11  | direct_pi | KIT    |
| GRB2    | direct_pi | KIT    |
| GRB7    | direct_pi | KIT    |

|      |           |        |
|------|-----------|--------|
| KIT  | direct_pi | PIK3R1 |
| KIT  | direct_pi | CRK    |
| CBL  | direct_pi | KIT    |
| GRB2 | direct_pi | KIT    |
| IL7R | direct_pi | KIT    |
| KIT  | direct_pi | IL7R   |
| KIT  | direct_pi | JAK3   |
| KIT  | direct_pi | STAT5B |

Supplementary Table 3- List of protein-protein interactions for the six sub-networks

VDR sub-network

| <b>Protein 1</b> |           | <b>Protein 2</b> |
|------------------|-----------|------------------|
| VDR              | direct_pi | NCOR1            |
| VDR              | direct_pi | CREBBP           |
| VDR              | direct_pi | SRC              |
| VDR              | direct_pi | MED1             |
| CEBPA            | direct_pi | VDR              |
| VDR              | direct_pi | CEBPA            |
| RXRA             | direct_pi | VDR              |
| VDR              | direct_pi | BAZ1B            |
| VDR              | direct_pi | SMARCA4          |
| VDR              | direct_pi | TCF3             |
| VDR              | direct_pi | NCOR1            |
| VDR              | direct_pi | SIN3A            |
| VDR              | direct_pi | HDAC2            |
| TCF3             | direct_pi | VDR              |
| BAZ1B            | direct_pi | VDR              |
| BAZ1B            | direct_pi | VDR              |
| BAZ1B            | direct_pi | VDR              |
| TCF3             | direct_pi | VDR              |
| VDR              | direct_pi | SRC              |
| VDR              | direct_pi | NCOA2            |
| VDR              | direct_pi | NCOA3            |
| LCOR             | direct_pi | VDR              |
| VDR              | direct_pi | TCF3             |
| TCF3             | direct_pi | VDR              |
| TCF3             | direct_pi | VDR              |
| TCF3             | direct_pi | VDR              |
| VDR              | direct_pi | RXRG             |
| VDR              | direct_pi | SRC              |
| VDR              | direct_pi | NCOA2            |
| VDR              | direct_pi | NR2E3            |
| VDR              | direct_pi | NCOA3            |
| VDR              | direct_pi | MED1             |
| VDR              | direct_pi | POLR2A           |
| VDR              | direct_pi | RXRA             |
| VDR              | direct_pi | POLR2A           |
| RNF14            | direct_pi | VDR              |
| NCOA4            | direct_pi | VDR              |
| VDR              | direct_pi | NCOA4            |
| VDR              | direct_pi | RXRA             |
| RXRA             | direct_pi | VDR              |
| VDR              | direct_pi | RXRA             |

|        |           |       |
|--------|-----------|-------|
| VDR    | direct_pi | EP300 |
| EP300  | direct_pi | VDR   |
| RXRA   | direct_pi | VDR   |
| VDR    | direct_pi | NCOA1 |
| RXRA   | direct_pi | VDR   |
| VDR    | direct_pi | RXRA  |
| VDR    | direct_pi | NCOA1 |
| VDR    | direct_pi | VDR   |
| COPS2  | direct_pi | VDR   |
| VDR    | direct_pi | NCOR1 |
| VDR    | direct_pi | COPS2 |
| VDR    | direct_pi | TAF11 |
| TAF11  | direct_pi | VDR   |
| MED1   | direct_pi | VDR   |
| RXRA   | direct_pi | VDR   |
| TAF7   | direct_pi | VDR   |
| VDR    | direct_pi | TAF7  |
| VDR    | direct_pi | RXRA  |
| VDR    | direct_pi | NCOA1 |
| NCOA3  | direct_pi | VDR   |
| CREBBP | direct_pi | VDR   |
| VDR    | direct_pi | SMAD3 |
| VDR    | direct_pi | RXRA  |
| SMAD3  | direct_pi | VDR   |
| RXRA   | direct_pi | VDR   |
| SMAD3  | direct_pi | VDR   |
| RXRA   | direct_pi | VDR   |
| VDR    | direct_pi | SMAD3 |
| GRIP1  | direct_pi | VDR   |
| RXRA   | direct_pi | VDR   |
| VDR    | direct_pi | MED1  |
| VDR    | direct_pi | RXRA  |
| VDR    | direct_pi | NCOA1 |
| BAZ1B  | direct_pi | VDR   |
| TCF3   | direct_pi | VDR   |
| VDR    | direct_pi | SRC   |
| VDR    | direct_pi | HNF4A |
| HNF4A  | direct_pi | VDR   |
| MAPK3  | direct_pi | VDR   |
| MAPK1  | direct_pi | VDR   |
| RXRA   | direct_pi | VDR   |
| runx2b | direct_pi | VDR   |
| VDR    | direct_pi | TP53  |
| TP53   | direct_pi | VDR   |

|       |           |           |
|-------|-----------|-----------|
| VDR   | direct_pi | HR        |
| VDR   | direct_pi | FOXO3     |
| VDR   | direct_pi | FOXO4     |
| VDR   | direct_pi | NCOA3     |
| VDR   | direct_pi | SIRT1     |
| VDR   | direct_pi | PPP1CC    |
| FOXO3 | direct_pi | VDR       |
| VDR   | direct_pi | FOXO3     |
| VDR   | direct_pi | SIRT1     |
| VDR   | direct_pi | MED12     |
| VDR   | direct_pi | MED13     |
| VDR   | direct_pi | MED1      |
| VDR   | direct_pi | MED14     |
| VDR   | direct_pi | MED24     |
| VDR   | direct_pi | MED23     |
| VDR   | direct_pi | MED16     |
| VDR   | direct_pi | MED4      |
| VDR   | direct_pi | MED7      |
| VDR   | direct_pi | MED6      |
| VDR   | direct_pi | MED12     |
| VDR   | direct_pi | MED1      |
| VDR   | direct_pi | MED14     |
| VDR   | direct_pi | CDKN1A    |
| VDR   | direct_pi | ACTN4     |
| ACTN4 | direct_pi | VDR       |
| VDR   | direct_pi | RXRA      |
| VDR   | direct_pi | EIF3I     |
| VDR   | direct_pi | SRC       |
| VDR   | direct_pi | NRIP1     |
| VDR   | direct_pi | HMGN3     |
| VDR   | direct_pi | RXRG      |
| VDR   | direct_pi | CLASRP    |
| VDR   | direct_pi | NR1H2     |
| VDR   | direct_pi | GABARAPL2 |
| VDR   | direct_pi | GNPAT     |
| VDR   | direct_pi | NROB2     |
| VDR   | direct_pi | RXRB      |
| VDR   | direct_pi | GABARAPL1 |
| VDR   | direct_pi | CASC4     |
| SRC   | direct_pi | VDR       |
| MED1  | direct_pi | VDR       |
| VDR   | direct_pi | SRC       |
| VDR   | direct_pi | MED1      |
| VDR   | direct_pi | CDK11B    |

|        |           |        |
|--------|-----------|--------|
| CDK11B | direct_pi | VDR    |
| VDR    | direct_pi | UBC    |
| VDR    | direct_pi | PPP1CC |
| VDR    | direct_pi | PPP1CC |
| VDR    | direct_pi | PPP1CC |
| NCOA6  | direct_pi | VDR    |
| NCOA6  | direct_pi | VDR    |
| UBC    | direct_pi | VDR    |
| VDR    | direct_pi | SRC    |
| NCOR1  | direct_pi | VDR    |
| RXRA   | direct_pi | VDR    |
| VDR    | direct_pi | NCOR1  |
| VDR    | direct_pi | NCOA1  |
| VDR    | direct_pi | PSMC5  |
| VDR    | direct_pi | UBC    |
| VDR    | direct_pi | BRCA1  |
| VDR    | direct_pi | RXRA   |
| MYC    | direct_pi | VDR    |
| MXD1   | direct_pi | VDR    |
| Hr     | direct_pi | VDR    |
| RXRA   | direct_pi | VDR    |
| VDR    | direct_pi | HR     |
| VDR    | direct_pi | HR     |
| UBC    | direct_pi | VDR    |
| VDR    | direct_pi | PTPN3  |
| VDR    | direct_pi | RXRA   |
| VDR    | direct_pi | RXRA   |
| VDR    | direct_pi | RXRA   |
| CCND3  | direct_pi | VDR    |
| CFH    | direct_pi | VDR    |
| CXXC5  | direct_pi | VDR    |
| RXRB   | direct_pi | VDR    |
| PRCP   | direct_pi | VDR    |
| PRKCSH | direct_pi | VDR    |
| RXRA   | direct_pi | VDR    |
| CDCA7L | direct_pi | VDR    |
| MMRN2  | direct_pi | VDR    |
| NKD2   | direct_pi | VDR    |
| SRPK1  | direct_pi | VDR    |

Supplementary Table 3- List of protein-protein interactions for the six sub-networks

AIRE-HLA-PSMB sub-network

| <b>Protein 1</b> |           | <b>Protein 2</b> |
|------------------|-----------|------------------|
| UBC              | direct_pi | PSMB8            |
| tat              | direct_pi | PSMB8            |
| PSMA4            | direct_pi | PSMB8            |
| PSMA2            | direct_pi | PSMB8            |
| PSMB1            | direct_pi | PSMB8            |
| PSMB9            | direct_pi | PSMB8            |
| PSMB8            | direct_pi | POMP             |
| POMP             | direct_pi | PSMB8            |
| PSMB8            | direct_pi | POMP             |
| PSMA1            | direct_pi | PSMB8            |
| PSMA2            | direct_pi | PSMB8            |
| USP7             | direct_pi | PSMB8            |
| PSMB8            | direct_pi | ABCB1            |
| PSMB8            | direct_pi | TAP1             |
| PSMB8            | direct_pi | TAP2             |
| ABCB1            | direct_pi | PSMB8            |
| TAP1             | direct_pi | PSMB8            |
| PSMB1            | direct_pi | PSMB8            |
| PSMB4            | direct_pi | PSMB8            |
| PSMB8            | direct_pi | PSMB3            |
| PSMB8            | direct_pi | PSMB1            |
| PSMB8            | direct_pi | PSMB6            |
| PSMB8            | direct_pi | PSMB7            |
| PSMB8            | direct_pi | PSMB8            |
| PSMB8            | direct_pi | PSMB9            |
| PSMB8            | direct_pi | PSMB10           |
| PSMB8            | direct_pi | POMP             |
| POMP             | direct_pi | PSMB8            |
| PSMA6            | direct_pi | PSMB8            |
| PSMB7            | direct_pi | PSMB8            |
| PSMB8            | direct_pi | HCVgp1           |
| HCVgp1           | direct_pi | PSMB8            |
| PSMA4            | direct_pi | PSMB8            |
| PSMB6            | direct_pi | PSMB8            |
| PSME1            | direct_pi | PSMB8            |
| PSME2            | direct_pi | PSMB8            |
| UBC              | direct_pi | PSMB8            |
| UBC              | direct_pi | PSMB8            |
| PSMB7            | direct_pi | PSMB8            |
| PSMA2            | direct_pi | PSMB8            |
| PSMB4            | direct_pi | PSMB8            |



|        |           |        |
|--------|-----------|--------|
| PSMA5  | direct_pi | PSMB8  |
| PSMB5  | direct_pi | PSMB8  |
| PSMA3  | direct_pi | PSMB8  |
| PSMA1  | direct_pi | PSMB8  |
| PSMB2  | direct_pi | PSMB8  |
| PSMB6  | direct_pi | PSMB8  |
| PSMB1  | direct_pi | PSMB8  |
| PSMA6  | direct_pi | PSMB8  |
| PSMA4  | direct_pi | PSMB8  |
| PSMB3  | direct_pi | PSMB8  |
| PSMA7  | direct_pi | PSMB8  |
| PSMA8  | direct_pi | PSMB8  |
| PSMC5  | direct_pi | PSMB8  |
| PSMC1  | direct_pi | PSMB8  |
| PSMC2  | direct_pi | PSMB8  |
| PSMB8  | direct_pi | PSMD8  |
| PSMC4  | direct_pi | PSMB8  |
| PSMC3  | direct_pi | PSMB8  |
| PSMB8  | direct_pi | USP9X  |
| PSMA2  | direct_pi | PSMB8  |
| LSM1   | direct_pi | PSMB8  |
| PSMB8  | direct_pi | GCN1L1 |
| PSMB8  | direct_pi | HNRNPM |
| PSMB8  | direct_pi | PSMA2  |
| PSMB8  | direct_pi | PSMA3  |
| PSMB8  | direct_pi | PSMA4  |
| PSMB8  | direct_pi | PSMA5  |
| PSMB8  | direct_pi | PSMB1  |
| PSMB8  | direct_pi | PSMB4  |
| PSMB8  | direct_pi | PSMB5  |
| PSMB8  | direct_pi | PSMB6  |
| PSMB8  | direct_pi | PSMB7  |
| CCT2   | direct_pi | PSMB8  |
| DHX38  | direct_pi | PSMB8  |
| EIF4G1 | direct_pi | PSMB8  |
| IKBKG  | direct_pi | PSMB8  |
| PSMA1  | direct_pi | PSMB8  |
| PSMA6  | direct_pi | PSMB8  |
| PSMB2  | direct_pi | PSMB8  |
| RPP38  | direct_pi | PSMB8  |
| UBC    | direct_pi | PSMB8  |
| tat    | direct_pi | PSMB8  |
| PSMA4  | direct_pi | PSMB8  |
| PSMA2  | direct_pi | PSMB8  |

|        |           |        |
|--------|-----------|--------|
| PSMB1  | direct_pi | PSMB8  |
| PSMB9  | direct_pi | PSMB8  |
| PSMB8  | direct_pi | POMP   |
| POMP   | direct_pi | PSMB8  |
| PSMB8  | direct_pi | POMP   |
| PSMA1  | direct_pi | PSMB8  |
| PSMA2  | direct_pi | PSMB8  |
| USP7   | direct_pi | PSMB8  |
| PSMB8  | direct_pi | ABCB1  |
| PSMB8  | direct_pi | TAP1   |
| PSMB8  | direct_pi | TAP2   |
| ABCB1  | direct_pi | PSMB8  |
| TAP1   | direct_pi | PSMB8  |
| PSMB1  | direct_pi | PSMB8  |
| PSMB4  | direct_pi | PSMB8  |
| PSMB8  | direct_pi | PSMB3  |
| PSMB8  | direct_pi | PSMB1  |
| PSMB8  | direct_pi | PSMB6  |
| PSMB8  | direct_pi | PSMB7  |
| PSMB8  | direct_pi | PSMB8  |
| PSMB8  | direct_pi | PSMB9  |
| PSMB8  | direct_pi | PSMB10 |
| PSMB8  | direct_pi | POMP   |
| POMP   | direct_pi | PSMB8  |
| PSMA6  | direct_pi | PSMB8  |
| PSMB7  | direct_pi | PSMB8  |
| PSMB8  | direct_pi | HCVgp1 |
| HCVgp1 | direct_pi | PSMB8  |
| PSMA4  | direct_pi | PSMB8  |
| PSMB6  | direct_pi | PSMB8  |
| PSME1  | direct_pi | PSMB8  |
| PSME2  | direct_pi | PSMB8  |
| UBC    | direct_pi | PSMB8  |
| UBC    | direct_pi | PSMB8  |
| PSMB7  | direct_pi | PSMB8  |
| PSMA2  | direct_pi | PSMB8  |
| PSMB4  | direct_pi | PSMB8  |
| PSMA5  | direct_pi | PSMB8  |
| PSMB5  | direct_pi | PSMB8  |
| PSMA3  | direct_pi | PSMB8  |
| PSMA1  | direct_pi | PSMB8  |
| PSMB2  | direct_pi | PSMB8  |
| PSMB6  | direct_pi | PSMB8  |
| PSMB1  | direct_pi | PSMB8  |

|        |           |         |
|--------|-----------|---------|
| PSMA6  | direct_pi | PSMB8   |
| PSMA4  | direct_pi | PSMB8   |
| PSMB3  | direct_pi | PSMB8   |
| PSMA7  | direct_pi | PSMB8   |
| PSMA8  | direct_pi | PSMB8   |
| PSMC5  | direct_pi | PSMB8   |
| PSMC1  | direct_pi | PSMB8   |
| PSMC2  | direct_pi | PSMB8   |
| PSMB8  | direct_pi | PSMD8   |
| PSMC4  | direct_pi | PSMB8   |
| PSMC3  | direct_pi | PSMB8   |
| PSMB8  | direct_pi | USP9X   |
| PSMA2  | direct_pi | PSMB8   |
| LSM1   | direct_pi | PSMB8   |
| PSMB8  | direct_pi | GCN1L1  |
| PSMB8  | direct_pi | HNRNPM  |
| PSMB8  | direct_pi | PSMA2   |
| PSMB8  | direct_pi | PSMA3   |
| PSMB8  | direct_pi | PSMA4   |
| PSMB8  | direct_pi | PSMA5   |
| PSMB8  | direct_pi | PSMB1   |
| PSMB8  | direct_pi | PSMB4   |
| PSMB8  | direct_pi | PSMB5   |
| PSMB8  | direct_pi | PSMB6   |
| PSMB8  | direct_pi | PSMB7   |
| CCT2   | direct_pi | PSMB8   |
| DHX38  | direct_pi | PSMB8   |
| EIF4G1 | direct_pi | PSMB8   |
| IKBK   | direct_pi | PSMB8   |
| PSMA1  | direct_pi | PSMB8   |
| PSMA6  | direct_pi | PSMB8   |
| PSMB2  | direct_pi | PSMB8   |
| RPP38  | direct_pi | PSMB8   |
| CREBBP | direct_pi | AIRE    |
| AIRE   | direct_pi | AIRE    |
| AIRE   | direct_pi | AIRE    |
| CREBBP | direct_pi | AIRE    |
| AIRE   | direct_pi | AIRE    |
| AIRE   | direct_pi | AIRE    |
| CREBBP | direct_pi | AIRE    |
| CREBBP | direct_pi | AIRE    |
| AIRE   | direct_pi | MYBBP1A |
| AIRE   | direct_pi | NOP56   |
| AIRE   | direct_pi | DDX5    |

|       |           |           |
|-------|-----------|-----------|
| AIRE  | direct_pi | DDX17     |
| AIRE  | direct_pi | RUVBL2    |
| AIRE  | direct_pi | TOP2A     |
| AIRE  | direct_pi | PRKDC     |
| AIRE  | direct_pi | SSRP1     |
| AIRE  | direct_pi | PARP1     |
| AIRE  | direct_pi | POLR2A    |
| AIRE  | direct_pi | PCNA      |
| AIRE  | direct_pi | POLR2B    |
| AIRE  | direct_pi | MCM2      |
| AIRE  | direct_pi | MCM5      |
| AIRE  | direct_pi | MCM6      |
| AIRE  | direct_pi | MSH6      |
| AIRE  | direct_pi | HIST1H2AC |
| AIRE  | direct_pi | HIST1H2BO |
| AIRE  | direct_pi | MSH2      |
| AIRE  | direct_pi | NASP      |
| AIRE  | direct_pi | RAD21     |
| AIRE  | direct_pi | SMC1A     |
| AIRE  | direct_pi | SMC3      |
| AIRE  | direct_pi | CHD6      |
| AIRE  | direct_pi | TRIM28    |
| AIRE  | direct_pi | LMNB1     |
| AIRE  | direct_pi | KPNB1     |
| AIRE  | direct_pi | XPO1      |
| AIRE  | direct_pi | IPO7      |
| AIRE  | direct_pi | XPOT      |
| AIRE  | direct_pi | RANBP2    |
| AIRE  | direct_pi | RANBP9    |
| AIRE  | direct_pi | NUP93     |
| AIRE  | direct_pi | SRSF3     |
| AIRE  | direct_pi | SRSF1     |
| AIRE  | direct_pi | PABPC1    |
| AIRE  | direct_pi | SRSF2     |
| AIRE  | direct_pi | SNRPD3    |
| AIRE  | direct_pi | EFTUD2    |
| AIRE  | direct_pi | SNRPB     |
| AIRE  | direct_pi | GEMIN5    |
| PRKDC | direct_pi | AIRE      |
| SSRP1 | direct_pi | AIRE      |
| TOP2A | direct_pi | AIRE      |
| LMNB1 | direct_pi | AIRE      |
| NUP93 | direct_pi | AIRE      |
| NASP  | direct_pi | AIRE      |

|         |           |           |
|---------|-----------|-----------|
| DDX5    | direct_pi | AIRE      |
| SRSF2   | direct_pi | AIRE      |
| MYBBP1A | direct_pi | AIRE      |
| TRIM28  | direct_pi | AIRE      |
| RAD21   | direct_pi | AIRE      |
| SMC1A   | direct_pi | AIRE      |
| AIRE    | direct_pi | HSPA5     |
| AIRE    | direct_pi | HSPA4     |
| AIRE    | direct_pi | HIST1H3A  |
| AIRE    | direct_pi | HIST2H2BE |
| AIRE    | direct_pi | HIST1H3A  |
| AIRE    | direct_pi | HIST1H3A  |
| AIRE    | direct_pi | HIST1H3A  |
| AIRE    | direct_pi | UBAC1     |
| AIRE    | direct_pi | DAXX      |
| AIRE    | direct_pi | DAXX      |
| AIRE    | direct_pi | AIRE      |
| AIRE    | direct_pi | HDAC1     |
| AIRE    | direct_pi | HDAC2     |
| HIST3H3 | direct_pi | AIRE      |
| ATP4A   | direct_pi | AIRE      |
| HLA-B   | direct_pi | PFAS      |
| HLA-B   | direct_pi | VCP       |
| HLA-B   | direct_pi | AHCY      |
| HLA-B   | direct_pi | VARS      |
| HLA-B   | direct_pi | EZR       |
| HLA-B   | direct_pi | TARS      |
| HLA-B   | direct_pi | PLS3      |
| HLA-B   | direct_pi | PAICS     |
| HLA-B   | direct_pi | RUVBL1    |
| HLA-B   | direct_pi | PSMD1     |
| HLA-B   | direct_pi | TRIM28    |
| HLA-B   | direct_pi | MSN       |
| LILRB2  | direct_pi | HLA-B     |
| LILRB1  | direct_pi | HLA-B     |
| HLA-B   | direct_pi | CD8A      |
| HLA-B   | direct_pi | KIR3DS1   |
| TRIB3   | direct_pi | HLA-B     |
| ARHGEF4 | direct_pi | HLA-B     |
| PCK1    | direct_pi | HLA-B     |
| UBC     | direct_pi | HLA-B     |
| UBC     | direct_pi | HLA-B     |
| Tap2    | direct_pi | HLA-B     |
| HLA-B   | direct_pi | B2M       |

|         |           |        |
|---------|-----------|--------|
| Tap1    | direct_pi | HLA-B  |
| Tap2    | direct_pi | HLA-B  |
| Tap1    | direct_pi | HLA-B  |
| UBC     | direct_pi | HLA-B  |
| UBD     | direct_pi | HLA-B  |
| HLA-B   | direct_pi | NDUFA9 |
| GRDX    | direct_pi | HLA-B  |
| env     | direct_pi | HLA-B  |
| MMS19   | direct_pi | HLA-B  |
| ADRB2   | direct_pi | HLA-B  |
| HLA-B   | direct_pi | STAT1  |
| HLA-B   | direct_pi | HSPA5  |
| UBC     | direct_pi | HLA-B  |
| NEDD8   | direct_pi | HLA-B  |
| SUMO1   | direct_pi | HLA-B  |
| MAGEA4  | direct_pi | HLA-A  |
| MAGEA1  | direct_pi | HLA-A  |
| KIR3DL2 | direct_pi | HLA-A  |
| TRA@    | direct_pi | HLA-A  |
| TRB@    | direct_pi | HLA-A  |
| TAPBP   | direct_pi | HLA-A  |
| TAP1    | direct_pi | HLA-A  |
| HLA-A   | direct_pi | COPB1  |
| HLA-A   | direct_pi | COPG   |
| HLA-A   | direct_pi | TAPBP  |
| HLA-A   | direct_pi | TAP1   |
| HLA-A   | direct_pi | UBC    |
| UBC     | direct_pi | HLA-A  |
| HLA-A   | direct_pi | SYVN1  |
| HLA-A   | direct_pi | UBC    |
| HLA-A   | direct_pi | UBE2J1 |
| HLA-A   | direct_pi | DERL1  |
| HLA-A   | direct_pi | PSMD2  |
| HLA-A   | direct_pi | UBC    |
| UBC     | direct_pi | HLA-A  |
| UBC     | direct_pi | HLA-A  |
| UBC     | direct_pi | HLA-A  |
| UBC     | direct_pi | HLA-A  |
| TAP1    | direct_pi | HLA-A  |
| TRAM1   | direct_pi | HLA-A  |
| HLA-A   | direct_pi | UBC    |
| SEC61A1 | direct_pi | HLA-A  |
| Tap1    | direct_pi | HLA-A  |
| Tap2    | direct_pi | HLA-A  |

|        |           |        |
|--------|-----------|--------|
| BCAP31 | direct_pi | HLA-A  |
| LMAN1  | direct_pi | HLA-A  |
| HLA-A  | direct_pi | MAGEA4 |
| HLA-A  | direct_pi | BCAP31 |
| UBC    | direct_pi | HLA-A  |
| HLA-A  | direct_pi | B2M    |
| HLA-A  | direct_pi | B2M    |
| TAP2   | direct_pi | HLA-A  |
| env    | direct_pi | HLA-A  |
| UBC    | direct_pi | HLA-A  |
| UBC    | direct_pi | HLA-A  |
| MMS19  | direct_pi | HLA-A  |
| CALR   | direct_pi | HLA-A  |
| ATM    | direct_pi | HLA-A  |
| HLA-A  | direct_pi | STAT3  |
| GNAS   | direct_pi | HLA-A  |
| HLA-A  | direct_pi | GNAS   |
| HLA-A  | direct_pi | UBC    |
| HLA-A  | direct_pi | BAG6   |
| BAG6   | direct_pi | HLA-A  |
| VCP    | direct_pi | HLA-A  |
| UBC    | direct_pi | HLA-A  |
| NEDD8  | direct_pi | HLA-A  |
| SUMO1  | direct_pi | HLA-A  |

Supplementary Table 3- List of protein-protein interactions for the six sub-networks

XBP1-MSH6 sub-network

| <b>Protein 1</b> |           | <b>Protein 2</b> |
|------------------|-----------|------------------|
| ESR1             | direct_pi | XBP1             |
| XBP1             | direct_pi | ESR1             |
| XBP1             | direct_pi | FOS              |
| IRE1             | direct_pi | XBP1             |
| GLI1             | direct_pi | XBP1             |
| H1FO             | direct_pi | XBP1             |
| HDGF             | direct_pi | XBP1             |
| RBL2             | direct_pi | XBP1             |
| SRSF1            | direct_pi | XBP1             |
| SSX4             | direct_pi | XBP1             |
| XBP1             | direct_pi | NR0B2            |
| XBP1             | direct_pi | FUBP3            |
| XBP1             | direct_pi | H1FX             |
| XBP1             | direct_pi | TRIP4            |
| XBP1             | direct_pi | ZNF580           |
| XBP1             | direct_pi | PCBD2            |
| XBP1             | direct_pi | ZNF440           |
| XBP1             | direct_pi | PSMA5            |
| XBP1             | direct_pi | PSMA6            |
| XBP1             | direct_pi | PSMA8            |
| SUMO2            | direct_pi | XBP1             |
| UBC              | direct_pi | XBP1             |
| SUMO2            | direct_pi | XBP1             |
| UBC              | direct_pi | XBP1             |
| UBC              | direct_pi | XBP1             |
| ATF6B            | direct_pi | XBP1             |
| ATF6             | direct_pi | XBP1             |
| XBP1             | direct_pi | ATF6B            |
| XBP1             | direct_pi | ATF6             |
| XBP1             | direct_pi | XBP1             |
| XBP1             | direct_pi | CREBZF           |
| CREBZF           | direct_pi | XBP1             |
| BRCA1            | direct_pi | MSH6             |
| CASP4            | direct_pi | MSH6             |
| MYC              | direct_pi | MSH6             |
| BRCA1            | direct_pi | MSH6             |
| MSH6             | direct_pi | BLM              |
| MSH6             | direct_pi | ATM              |
| MSH6             | direct_pi | MLH1             |
| BARD1            | direct_pi | MSH6             |
| BRCA1            | direct_pi | MSH6             |



|         |           |        |
|---------|-----------|--------|
| MRE11A  | direct_pi | MSH6   |
| MSH2    | direct_pi | MSH6   |
| NBN     | direct_pi | MSH6   |
| RAD50   | direct_pi | MSH6   |
| MSH6    | direct_pi | RFC1   |
| MSH2    | direct_pi | MSH6   |
| MSH6    | direct_pi | SMC1A  |
| MSH2    | direct_pi | MSH6   |
| MSH6    | direct_pi | PCNA   |
| MSH6    | direct_pi | PCNA   |
| MSH6    | direct_pi | PCNA   |
| PCNA    | direct_pi | MSH6   |
| MSH6    | direct_pi | MSH2   |
| MSH2    | direct_pi | MSH6   |
| MSH2    | direct_pi | MSH6   |
| PMS2    | direct_pi | MSH6   |
| AIRE    | direct_pi | MSH6   |
| MSH6    | direct_pi | ATR    |
| MSH6    | direct_pi | TOPBP1 |
| MSH6    | direct_pi | CLSPN  |
| MSH6    | direct_pi | CHEK1  |
| ATR     | direct_pi | MSH6   |
| CLSPN   | direct_pi | MSH6   |
| TOPBP1  | direct_pi | MSH6   |
| CHEK1   | direct_pi | MSH6   |
| UBC     | direct_pi | MSH6   |
| MSH6    | direct_pi | UBC    |
| PRKCZ   | direct_pi | MSH6   |
| BRCA1   | direct_pi | MSH6   |
| ESR1    | direct_pi | MSH6   |
| MORF4L1 | direct_pi | MSH6   |
| MYC     | direct_pi | MSH6   |
| EP300   | direct_pi | MSH6   |
| CREBBP  | direct_pi | MSH6   |
| BARD1   | direct_pi | MSH6   |
| SUMO1   | direct_pi | MSH6   |
| UBC     | direct_pi | MSH6   |
| UBC     | direct_pi | MSH6   |
| PCNA    | direct_pi | MSH6   |
| DTL     | direct_pi | MSH6   |
| MSH6    | direct_pi | CHAF1A |
| MSH6    | direct_pi | CHAF1A |
| MSH6    | direct_pi | CHAF1A |
| MSH6    | direct_pi | PCNA   |

|          |           |       |
|----------|-----------|-------|
| SMARCAD1 | direct_pi | MSH6  |
| UBC      | direct_pi | MSH6  |
| UBC      | direct_pi | MSH6  |
| UBC      | direct_pi | MSH6  |
| MSH6     | direct_pi | MSH2  |
| MSH6     | direct_pi | MLH1  |
| MSH6     | direct_pi | PMS2  |
| MSH6     | direct_pi | PMS1  |
| MLH1     | direct_pi | MSH6  |
| MSH2     | direct_pi | MSH6  |
| PMS2     | direct_pi | MSH6  |
| PMS1     | direct_pi | MSH6  |
| SUMO2    | direct_pi | MSH6  |
| SUMO2    | direct_pi | MSH6  |
| BLM      | direct_pi | MSH6  |
| TP53     | direct_pi | MSH6  |
| RAD51    | direct_pi | MSH6  |
| MSH6     | direct_pi | BLM   |
| MSH6     | direct_pi | MSH2  |
| XRCC6    | direct_pi | MSH6  |
| XRCC6    | direct_pi | MSH6  |
| MSH6     | direct_pi | XRCC6 |
| MSH6     | direct_pi | XRCC5 |
| MSH6     | direct_pi | PRKDC |
| SIRT7    | direct_pi | MSH6  |
| FBXO25   | direct_pi | MSH6  |
| NEDD8    | direct_pi | MSH6  |
| CUL3     | direct_pi | MSH6  |
| SLX4     | direct_pi | MSH6  |
| HUS1     | direct_pi | MSH6  |
| RAD1     | direct_pi | MSH6  |
| RAD9A    | direct_pi | MSH6  |
| HUS1     | direct_pi | MSH6  |
| RAD1     | direct_pi | MSH6  |
| RAD9A    | direct_pi | MSH6  |
| MUTYH    | direct_pi | MSH6  |
| MUTYH    | direct_pi | MSH6  |
| UBC      | direct_pi | MSH6  |
| UBC      | direct_pi | MSH6  |
| MSH6     | direct_pi | MLH1  |
| MSH6     | direct_pi | PMS2  |
| MLH1     | direct_pi | MSH6  |
| MSH2     | direct_pi | MSH6  |
| MSH6     | direct_pi | PCNA  |

|          |           |         |
|----------|-----------|---------|
| MSH3     | direct_pi | MSH6    |
| MSH6     | direct_pi | SUPT16H |
| MSH2     | direct_pi | MSH6    |
| CSNK2A1  | direct_pi | MSH6    |
| UBC      | direct_pi | MSH6    |
| UBC      | direct_pi | MSH6    |
| MSH2     | direct_pi | MSH6    |
| MSH6     | direct_pi | PCNA    |
| HDAC11   | direct_pi | MSH6    |
| UBD      | direct_pi | MSH6    |
| ATP6V1B2 | direct_pi | MSH6    |
| GANAB    | direct_pi | MSH6    |
| HYOU1    | direct_pi | MSH6    |
| XRCC6    | direct_pi | MSH6    |
| MSH6     | direct_pi | SAMHD1  |
| MSH6     | direct_pi | SUPT5H  |
| POLK     | direct_pi | MSH6    |

Supplementary Table 3- List of protein-protein interactions for the six sub-networks

FAS-CASP sub-network

| <b>Protein 1</b> |           | <b>Protein 2</b> |
|------------------|-----------|------------------|
| FAS              | direct_pi | FADD             |
| FAS              | direct_pi | DAXX             |
| FAS              | direct_pi | FASLG            |
| FAS              | direct_pi | FAF1             |
| FAS              | direct_pi | PDCD6            |
| FAS              | direct_pi | UBE2I            |
| FAS              | direct_pi | SUMO1            |
| FAS              | direct_pi | CASP8            |
| FAS              | direct_pi | CASP10           |
| FAS              | direct_pi | UBC              |
| FAS              | direct_pi | KRIT1            |
| FAS              | direct_pi | CFLAR            |
| FAS              | direct_pi | BMX              |
| FAS              | direct_pi | RARA             |
| FAS              | direct_pi | TRAF1            |
| FAS              | direct_pi | PRAM1            |
| FAS              | direct_pi | UBQLN1           |
| FAS              | direct_pi | FAF2             |
| FAS              | direct_pi | MAP3K5           |
| FAS              | direct_pi | TRADD            |
| FAS              | direct_pi | PML              |
| FAS              | direct_pi | MDB4             |
| FAS              | direct_pi | UBE2I            |
| HSPA5            | direct_pi | CASP7            |
| CASP7            | direct_pi | CASP2            |
| BIRC7            | direct_pi | CASP7            |
| BIRC5            | direct_pi | CASP7            |
| XIAP             | direct_pi | CASP7            |
| CASP8            | direct_pi | CASP7            |
| BIRC3            | direct_pi | CASP7            |
| BIRC2            | direct_pi | CASP7            |
| XIAP             | direct_pi | CASP7            |
| CASP8            | direct_pi | CASP7            |
| CASP10           | direct_pi | CASP7            |
| CASP7            | direct_pi | TNFRSF1A         |
| BIRC5            | direct_pi | CASP7            |
| BIRC5            | direct_pi | CASP7            |
| CASP7            | direct_pi | XIAP             |
| XIAP             | direct_pi | CASP7            |
| XIAP             | direct_pi | CASP7            |
| BIRC2            | direct_pi | CASP7            |

|       |           |          |
|-------|-----------|----------|
| CASP7 | direct_pi | UBC      |
| BIRC2 | direct_pi | CASP7    |
| UBC   | direct_pi | CASP7    |
| BIRC6 | direct_pi | CASP7    |
| XIAP  | direct_pi | CASP7    |
| TERF1 | direct_pi | CASP7    |
| NEDD8 | direct_pi | CASP7    |
| CASP7 | direct_pi | UBC      |
| CASP7 | direct_pi | COPS6    |
| CASP7 | direct_pi | BIRC6    |
| BIRC2 | direct_pi | CASP7    |
| XIAP  | direct_pi | CASP7    |
| XIAP  | direct_pi | CASP7    |
| BIRC2 | direct_pi | CASP7    |
| BIRC3 | direct_pi | CASP7    |
| CASP7 | direct_pi | XIAP     |
| XIAP  | direct_pi | CASP7    |
| CASP7 | direct_pi | XIAP     |
| XIAP  | direct_pi | CASP7    |
| CASP7 | direct_pi | XIAP     |
| XIAP  | direct_pi | CASP7    |
| XIAP  | direct_pi | CASP7    |
| CASP7 | direct_pi | XIAP     |
| BAX   | direct_pi | CASP7    |
| CASP7 | direct_pi | SP1      |
| CCT2  | direct_pi | CASP7    |
| CCT2  | direct_pi | CASP7    |
| VCP   | direct_pi | CASP7    |
| BIRC2 | direct_pi | CASP7    |
| UBC   | direct_pi | CASP7    |
| CASP7 | direct_pi | RB1      |
| CASP7 | direct_pi | RB1      |
| CASP7 | direct_pi | PLA2G4B  |
| CASP7 | direct_pi | PARP1    |
| CASP7 | direct_pi | CLSPN    |
| CASP7 | direct_pi | PTGES3   |
| CASP7 | direct_pi | ARHGDI1A |
| CASP7 | direct_pi | PARP1    |
| CASP7 | direct_pi | VIM      |
| CASP7 | direct_pi | SPTAN1   |
| CASP7 | direct_pi | STAT1    |
| CASP7 | direct_pi | DFFA     |
| CASP7 | direct_pi | ROCK1    |
| CASP3 | direct_pi | CASP7    |

|       |           |         |
|-------|-----------|---------|
| CASP7 | direct_pi | CASP7   |
| CASP7 | direct_pi | CASP9   |
| GZMB  | direct_pi | CASP7   |
| Gzmb  | direct_pi | CASP7   |
| CAPN1 | direct_pi | CASP7   |
| CNDP2 | direct_pi | CASP7   |
| EEF2  | direct_pi | CASP7   |
| GNS   | direct_pi | CASP7   |
| PEPD  | direct_pi | CASP7   |
| CTSA  | direct_pi | CASP7   |
| CASP7 | direct_pi | EIF4H   |
| CASP7 | direct_pi | GBP2    |
| CASP7 | direct_pi | GINS2   |
| CASP7 | direct_pi | MVD     |
| CASP7 | direct_pi | RPS6KA1 |

Supplementary Table 3- List of protein-protein interactions for the six sub-networks

SOD-CAT sub-network

| <b>Protein 1</b> |           | <b>Protein 2</b> |
|------------------|-----------|------------------|
| BCL2             | direct_pi | SOD1             |
| SOD1             | direct_pi | BCL2             |
| BCL2             | direct_pi | SOD1             |
| SOD1             | direct_pi | BCL2             |
| SOD1             | direct_pi | HECW1            |
| SOD1             | direct_pi | SSR4             |
| CCS              | direct_pi | SOD1             |
| CCS              | direct_pi | SOD1             |
| RNF19A           | direct_pi | SOD1             |
| SOD1             | direct_pi | UBC              |
| PARK7            | direct_pi | SOD1             |
| SOD1             | direct_pi | HSPA8            |
| SOD1             | direct_pi | HSPA4            |
| PSMD4            | direct_pi | SOD1             |
| SOD1             | direct_pi | STUB1            |
| SOD1             | direct_pi | HSPA4            |
| SOD1             | direct_pi | UBC              |
| HSPA4            | direct_pi | SOD1             |
| RNF19A           | direct_pi | SOD1             |
| SOD1             | direct_pi | UBC              |
| RNF19A           | direct_pi | SOD1             |
| SOD1             | direct_pi | UBC              |
| RNF19A           | direct_pi | SOD1             |
| STUB1            | direct_pi | SOD1             |
| SOD1             | direct_pi | UBC              |
| SOD1             | direct_pi | CCS              |
| SOD1             | direct_pi | UBC              |
| SOD1             | direct_pi | UBC              |
| SOD1             | direct_pi | UBC              |
| SOD1             | direct_pi | UBC              |
| AMFR             | direct_pi | SOD1             |
| AMFR             | direct_pi | SOD1             |
| AMFR             | direct_pi | SOD1             |
| DYNLT1           | direct_pi | SOD1             |
| DYNLT1           | direct_pi | SOD1             |
| SOD1             | direct_pi | UBC              |
| SOD1             | direct_pi | HSPA4            |
| UBC              | direct_pi | SOD1             |
| UBC              | direct_pi | SOD1             |
| UBC              | direct_pi | SOD1             |
| SUMO4            | direct_pi | SOD1             |

|        |           |        |
|--------|-----------|--------|
| SOD1   | direct_pi | Stub1  |
| SOD1   | direct_pi | UBC    |
| COMMD1 | direct_pi | SOD1   |
| SOD1   | direct_pi | COMMD1 |
| CCS    | direct_pi | SOD1   |
| UBE3A  | direct_pi | SOD1   |
| SOD1   | direct_pi | UBC    |
| SOD1   | direct_pi | Sod1   |
| SOD1   | direct_pi | Hspa8  |
| SOD1   | direct_pi | Hspa2  |
| SOD1   | direct_pi | Hspa4l |
| SOD1   | direct_pi | Hspa1b |
| SOD1   | direct_pi | Hsph1  |
| SOD1   | direct_pi | Hspa4  |
| SOD1   | direct_pi | Hspa5  |
| SOD1   | direct_pi | Dnaja1 |
| SOD1   | direct_pi | Ccs    |
| SOD1   | direct_pi | Hspa8  |
| PRDX5  | direct_pi | SOD1   |
| AHCYL1 | direct_pi | SOD1   |
| PRDX1  | direct_pi | SOD1   |
| NME2   | direct_pi | SOD1   |
| PLS3   | direct_pi | SOD1   |
| SOD1   | direct_pi | SOD2   |
| NME1   | direct_pi | SOD1   |
| SOD1   | direct_pi | SPTBN1 |
| SOD1   | direct_pi | TIAL1  |
| PRDX2  | direct_pi | SOD1   |
| PPP2CA | direct_pi | SOD1   |
| PPIA   | direct_pi | SOD1   |
| SOD1   | direct_pi | OPTN   |
| UBC    | direct_pi | SOD1   |
| UBC    | direct_pi | SOD1   |
| SOD1   | direct_pi | GSH1   |
| SOD1   | direct_pi | HDAC6  |
| SOD1   | direct_pi | UBC    |
| SMAD2  | direct_pi | SOD1   |
| CAT    | direct_pi | EHHADH |
| CAT    | direct_pi | ABL1   |
| CAT    | direct_pi | PEX5   |
| CAT    | direct_pi | ABL2   |
| CAT    | direct_pi | CAT    |
| CAT    | direct_pi | MECP2  |
| CAT    | direct_pi | KEAP1  |



|     |           |         |
|-----|-----------|---------|
| CAT | direct_pi | STIM1   |
| CAT | direct_pi | SUMO4   |
| CAT | direct_pi | USP53   |
| CAT | direct_pi | APP     |
| CAT | direct_pi | HSD17B4 |
